# Supplementary material for: Highly enantioselective and recyclable organocatalytic Michael addition of malonates to α,β-unsaturated aldehydes in aqueous media
Source: Royal Society of Chemistry journal article supplement (doi:10.1039/c2ob26248g), 2012-01-01

## Highly Enantioselective and Recyclable Organocatalytic Michael Addition of Malonates to $\alpha,\beta$ -Unsaturated Aldehydes in Aqueous Media

Subrata K. Ghosh, Kritanjali Dhungana, Allan D. Headley,\* and Bukuo Ni\*

Department of Chemistry, Texas A&M University-Commerce, Commerce, TX 75429-3011,

USA

E-mail: [Allan.Headley@tamuc.edu](mailto:Allan.Headley@tamuc.edu); [Bukuo.Ni@tamuc.edu](mailto:Bukuo.Ni@tamuc.edu)

Supporting Information

### Oxidation of the aldehydes to the carboxylic esters for HPLC analysis:

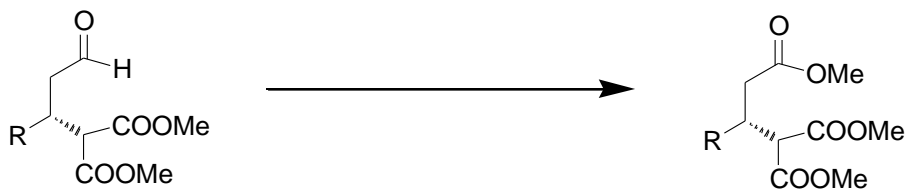

Representative procedure: 0.10 mmol of aldehydes (addition products) were diluted with 3.0 mL *t*-BuOH, and then 3.0 mL of 1 M NaH<sub>2</sub>PO<sub>4</sub> (aq.) and 3.0 mL of 1 M KMnO<sub>4</sub> were added successively. After 5 min of vigorous stirring 5.0 mL saturated NaHSO<sub>3</sub> was added and the pH was adjusted to approximately 3 with 1 M HCl. The resulting mixture was extracted 3 times with 10 mL EtOAc, the combined organic layers were washed with 10 mL of water and 10 mL brine, and dried over MgSO<sub>4</sub>. The organic layer was concentrated in vacuum and the residual acid was dissolved in 2.0 mL toluene and 5.0 mL MeOH. TMSCHN<sub>2</sub> (2.0 M in *n*-hexane) was added dropwise until the yellow colour persisted. The solution was stirred for an additional 10 min and quenched with a drop of concentrated AcOH. The solvents were evaporated under vacuum. The crude product was purified by column chromatography on silica gel to yield the corresponding carboxylic ester.

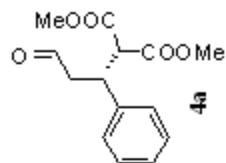

Automation directory: /export/home/bun/vmr/sys/data/auts\_2886\_85.22  
File: /export/home/bun/vmr/sys/data/auts\_2886\_85.22  
Sample: sp-288-1

Pulse Sequence: zgpg30

Solvent: cdcl3

Operator: bun

File: sp-288-1

VNMR5-400 "nmr483"

Pulse delay: 1.000 sec

Pulse width: 2.000 sec

Acq. time: 2.619 sec

Width: 6410.3 Hz

Observed frequency: 399.7309068 MHz

DATA PROCESSING

Line broadening: 0.2 Hz

FT size: 65536

Total time: 9 min, 30 sec

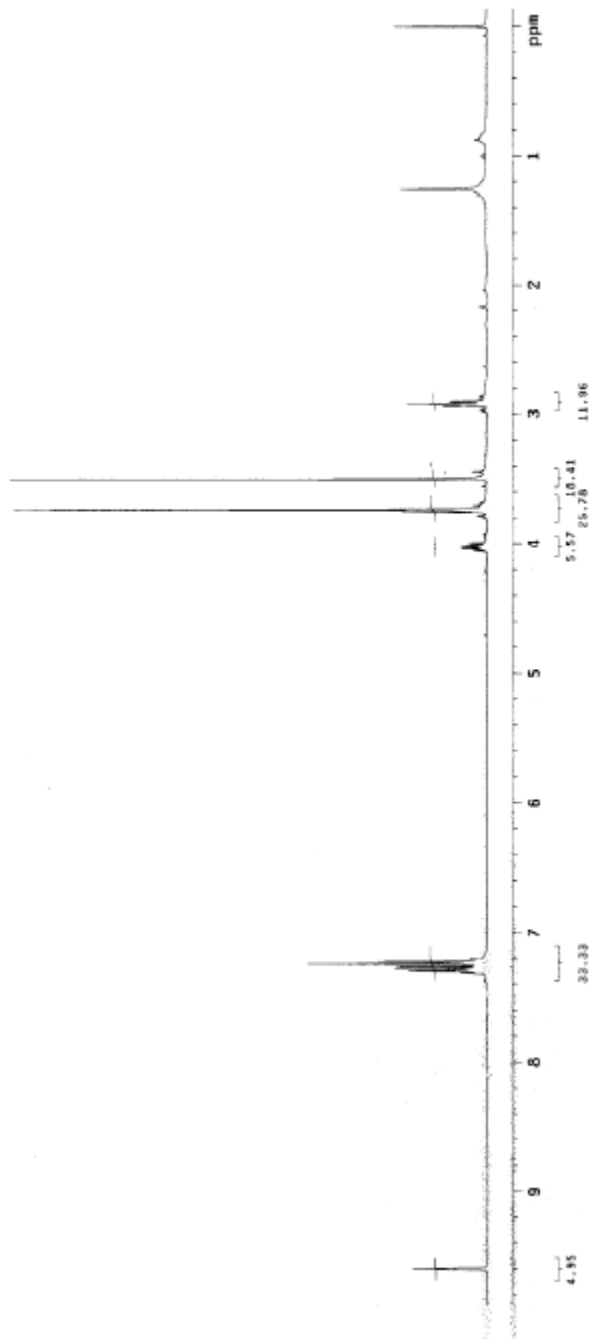

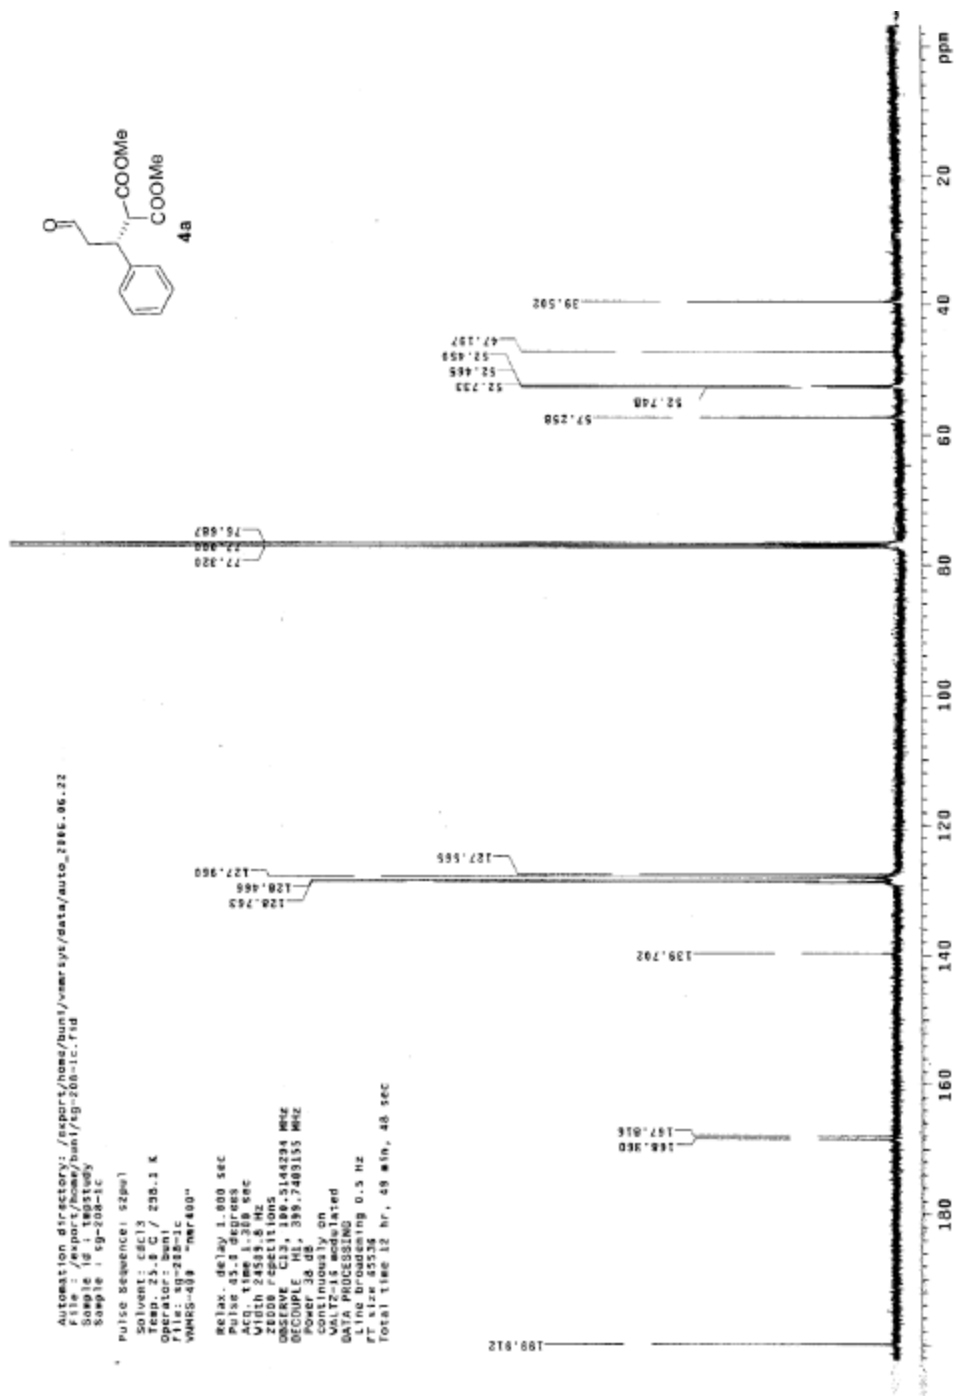

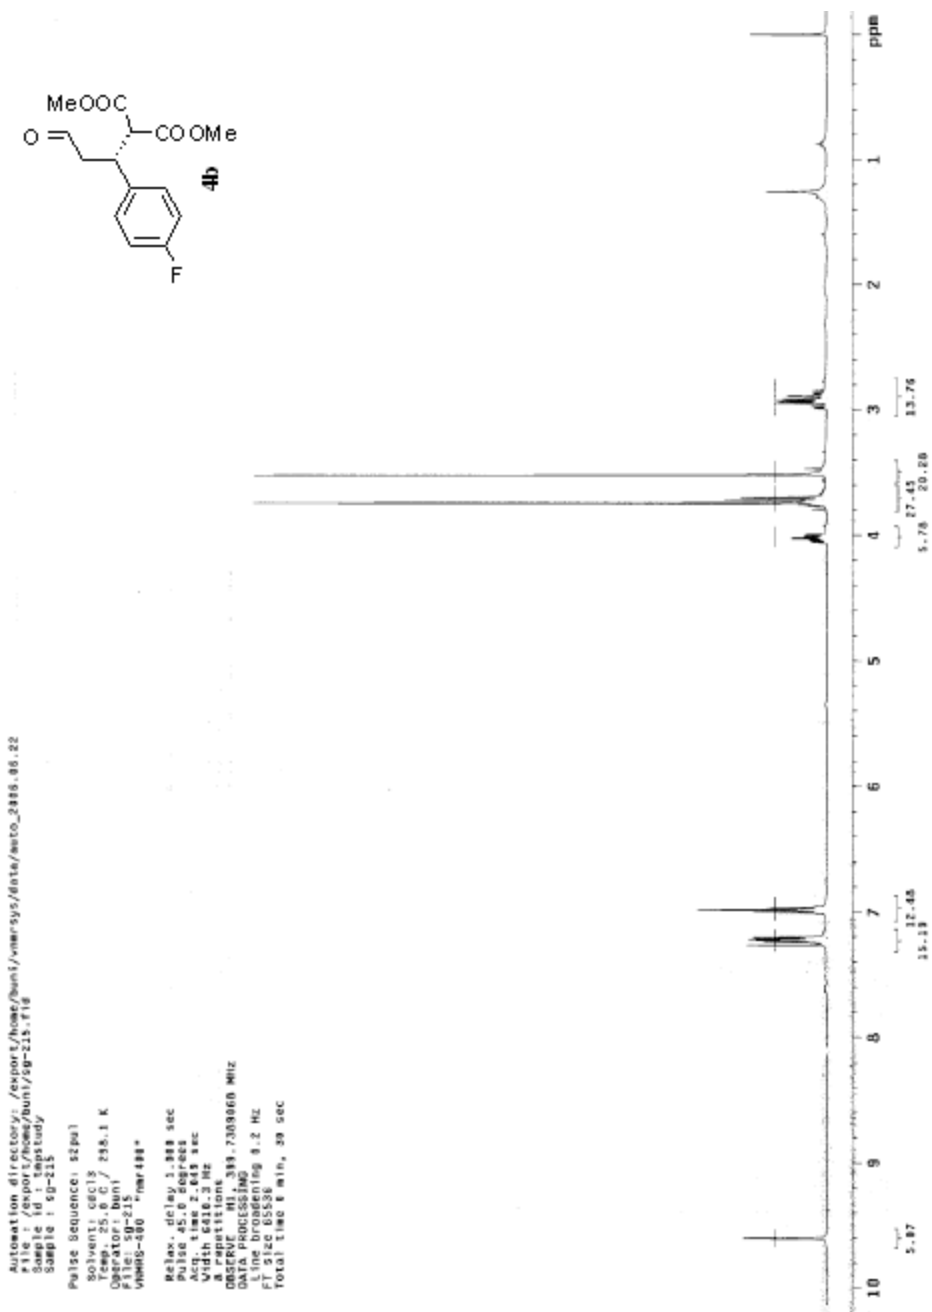

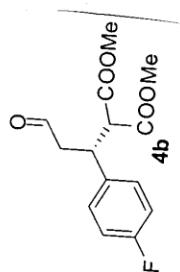

Automation directory: /export/home/bun1/vnmrSYS/data/aut0\_2006.06.22  
File: /export/home/bun1/sg-215c.fid  
Sample id: tmpstudy  
File: sg-215c  
Sample: sg-215c

Pulse Sequence: s2pu1  
Solvent: cdcl3  
Temp: 25.0 C / 298.1 K  
Operator: bun1  
File: sg-215c  
VNMRS-400 "nmr400"

Relax. delay 1.000 sec  
Pulse 45.0 degrees  
Acq. time 1.300 sec  
10 h 24509.6 Hz  
260 h 24509.6 Hz  
OBSERVE C13, 300.5144287 MHz  
DECUPLE H1, 399.7409155 MHz  
Power 38 dB,  
continuously on  
WALTZ-16 modulated  
DATA PROCESSING  
Line broadening 0.5 Hz  
FT size 65536  
Total time 12 hr, 49 min, 48 sec

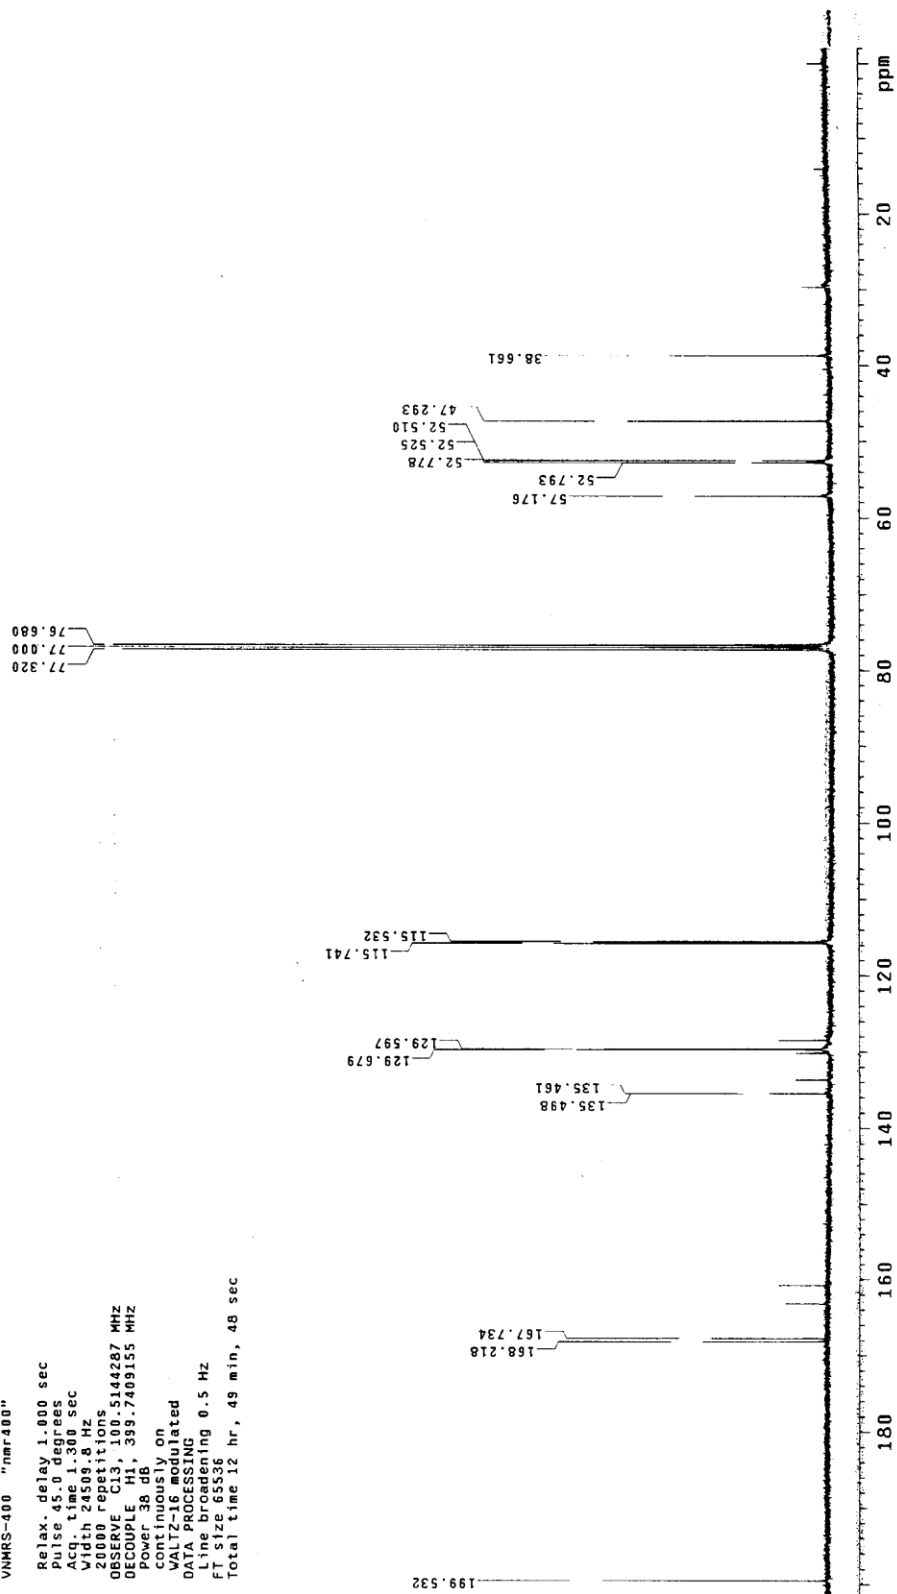

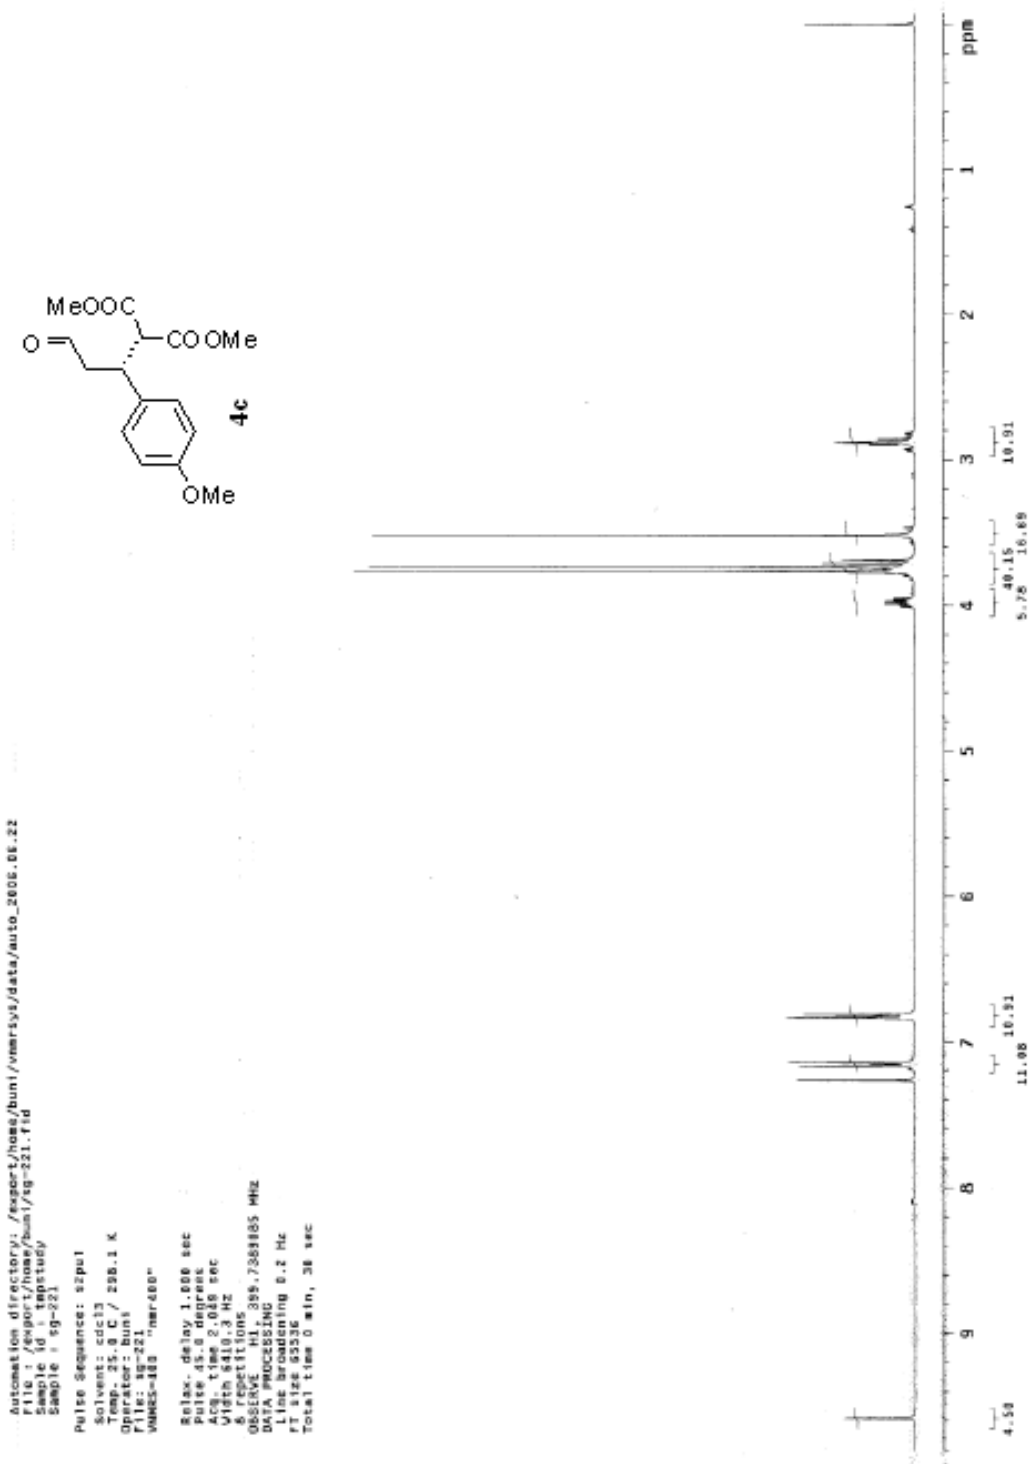

Automation directory: /export/home/buni/vnmrsys/data/auto\_2006\_06.22  
File : /export/home/buni/sg-221c.fid  
Sample id : tnpstudy  
Sample : sg-221

Pulse Sequence: s2pu1

Solvent: cdcl3  
Temp: 300.2 K  
P1: 1.00 sec  
File: sg-221c  
VNMRS-400 "nmr400"

Relax. delay: 1.000 sec

Pulse: 45.0 degrees

Acq. time: 1.300 sec

Width: 24509.8 Hz

20000 repetitions

OBSERVE: C13, 100.5144287 MHz

DECOUPLE: H1, 399.7409155 MHz

Power: 38 dB

continuously on

WALTZ-16 modulated

DATA PROCESSING

Line broadening: 0.5 Hz

FT size: 85336

Total time: 12 hr, 49 min, 48 sec

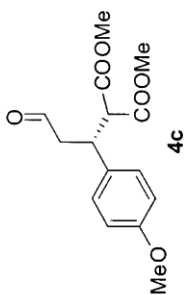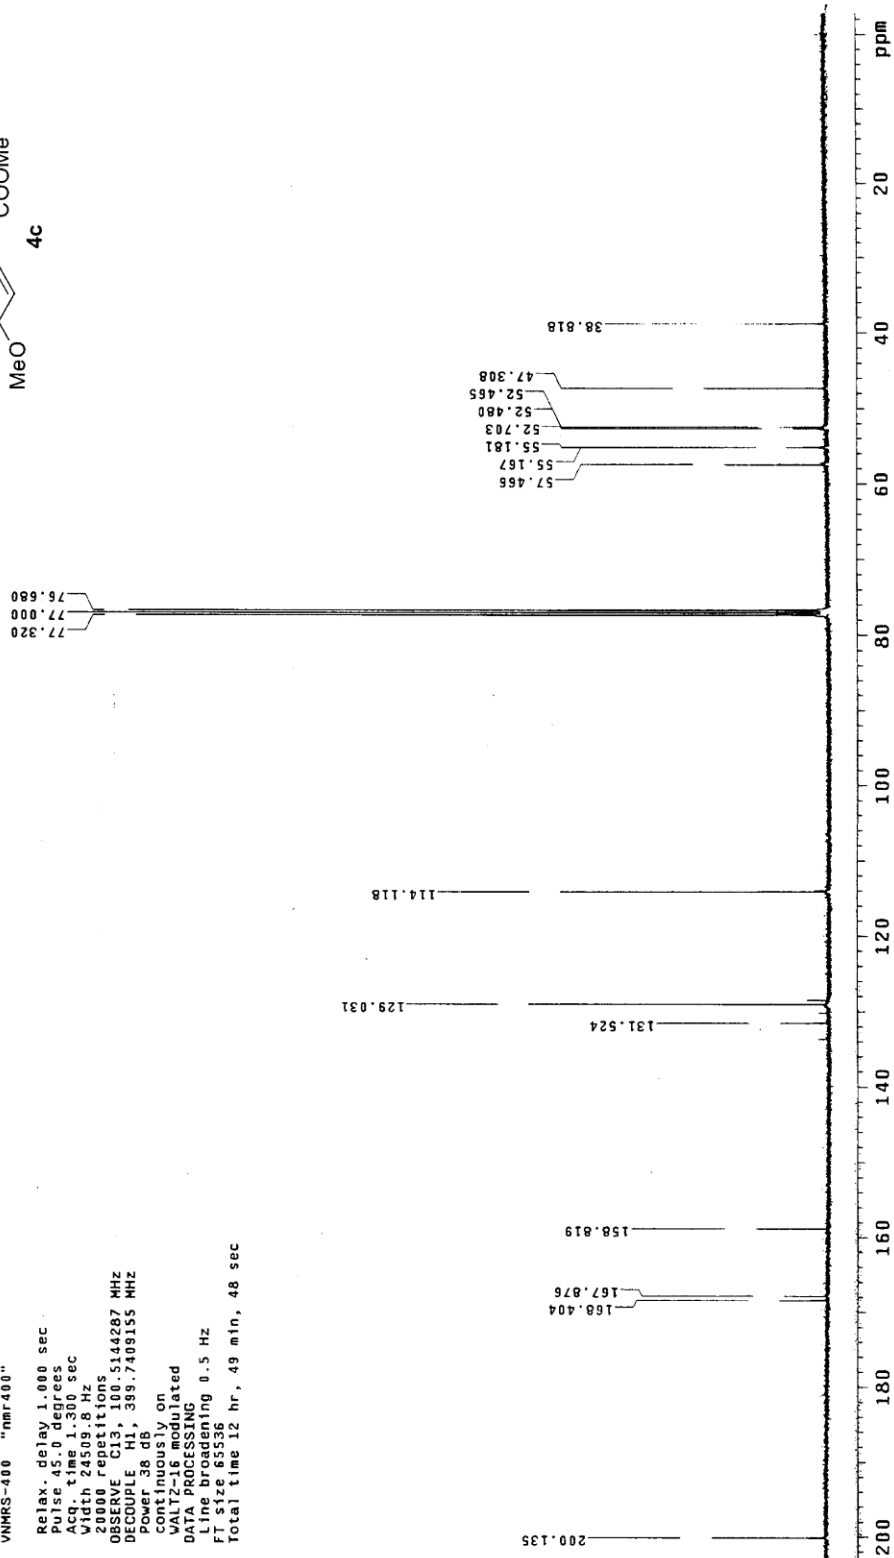

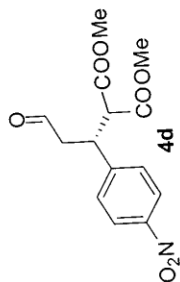

Automation directory: /export/home/buni/vnmrsys/data/auto\_2006.06.22  
File: /export/home/buni/k-1-77.fid  
Sample id: tmpstudy  
Sample: k-1-77

Pulse Sequence: s2pu1  
Solvent: cdcl3  
Temp: 25.0 C / 298.1 K  
Operator: buni  
File: k-1-77  
VNMRS-400 "nmr400"

Relax. delay 1.000 sec  
Pulse 45.0 degrees  
Acq. time 2.049 sec  
Width 840.3 Hz  
OBSERVE 1Homs 399.7389077 MHz  
DATA PROCESSING  
Line broadening 0.2 Hz  
FI size 65536  
Total time 0 min, 30 sec

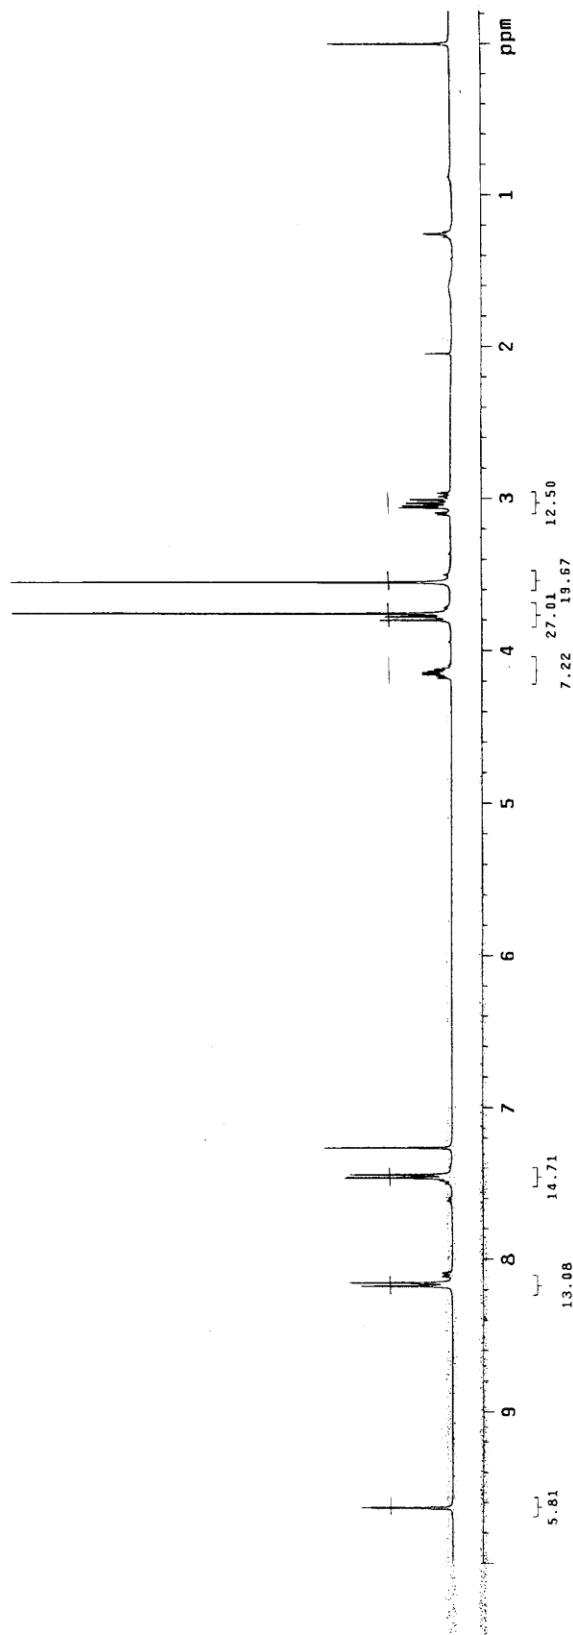



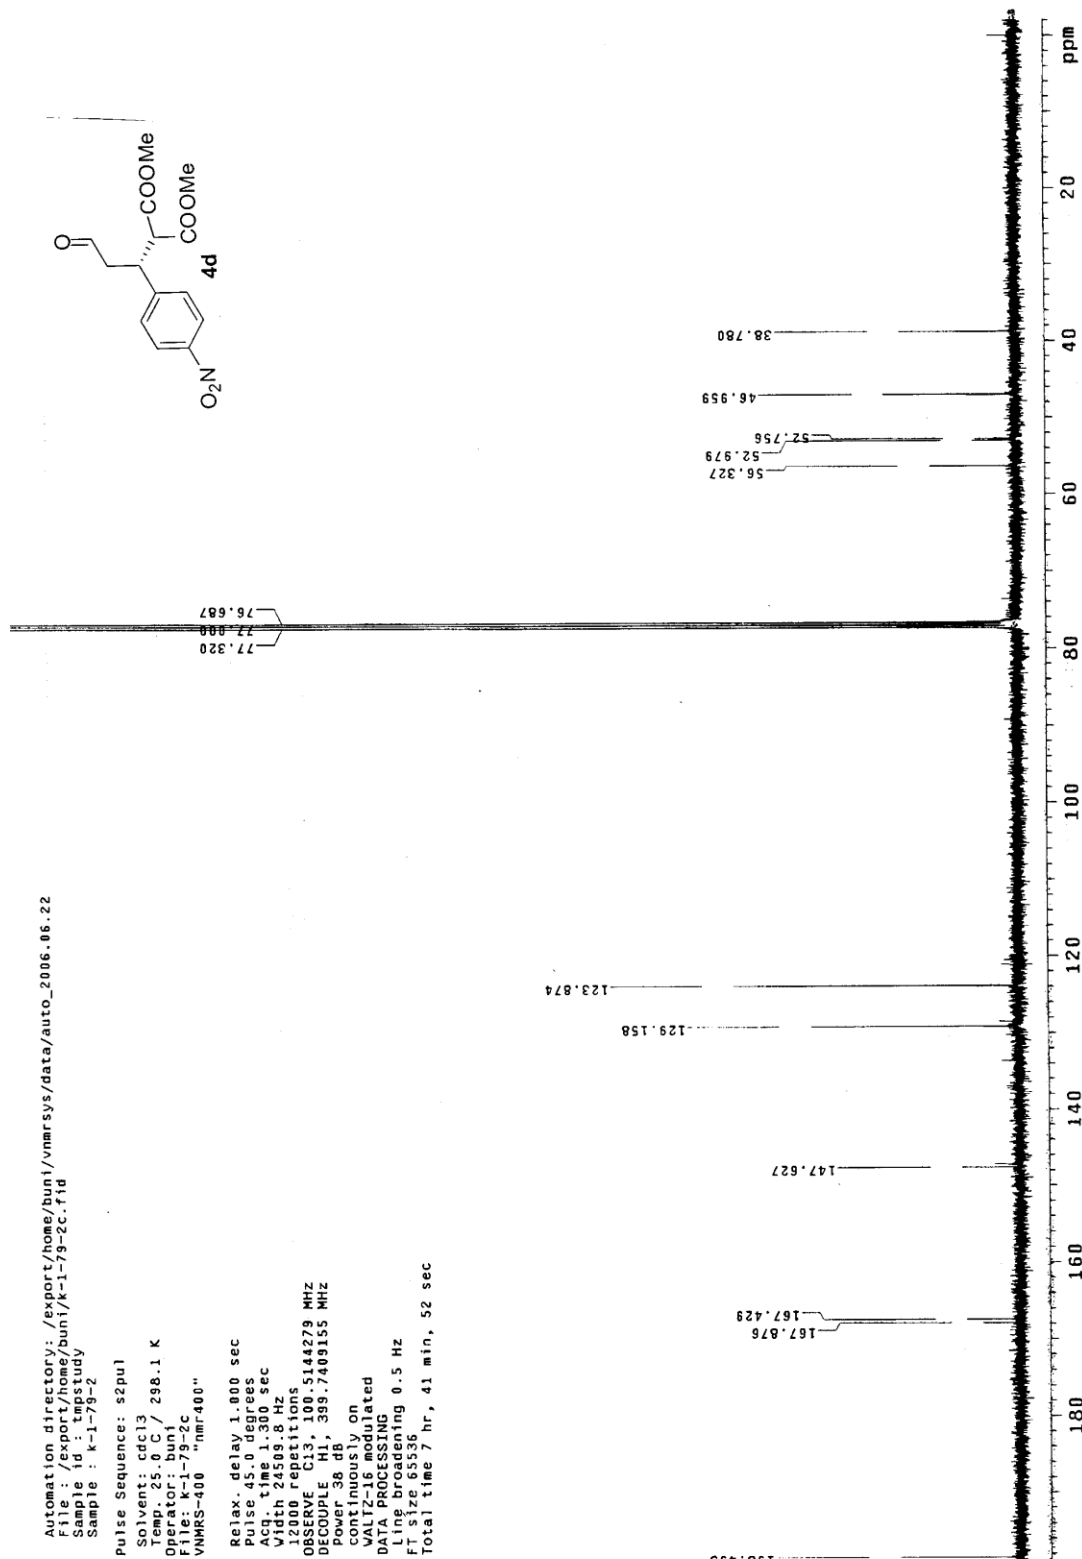

Automation directory: /export/home/bunt/vnmr/sv/sets/astro\_2006\_06.22  
File: /export/home/bunt/vnmr/sv/sets/astro\_2006\_06.22  
Sample: 50-214

Pulse sequence: zgpg30

Solvent: CDCl3  
Operator: bunt  
File: 50-214

VNAME=489 "nmr400"

Pulse delay: 1.000 sec  
Pulse: 400 degrees

Acq. time: 2.045 sec

Width: 410.3 Hz

Observed: 309.7305805 MHz

Processing: 0.2 Hz

Line broadening: 0.2 Hz

FT size: 65536

Total time: 9 min, 30 sec

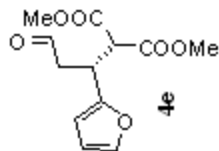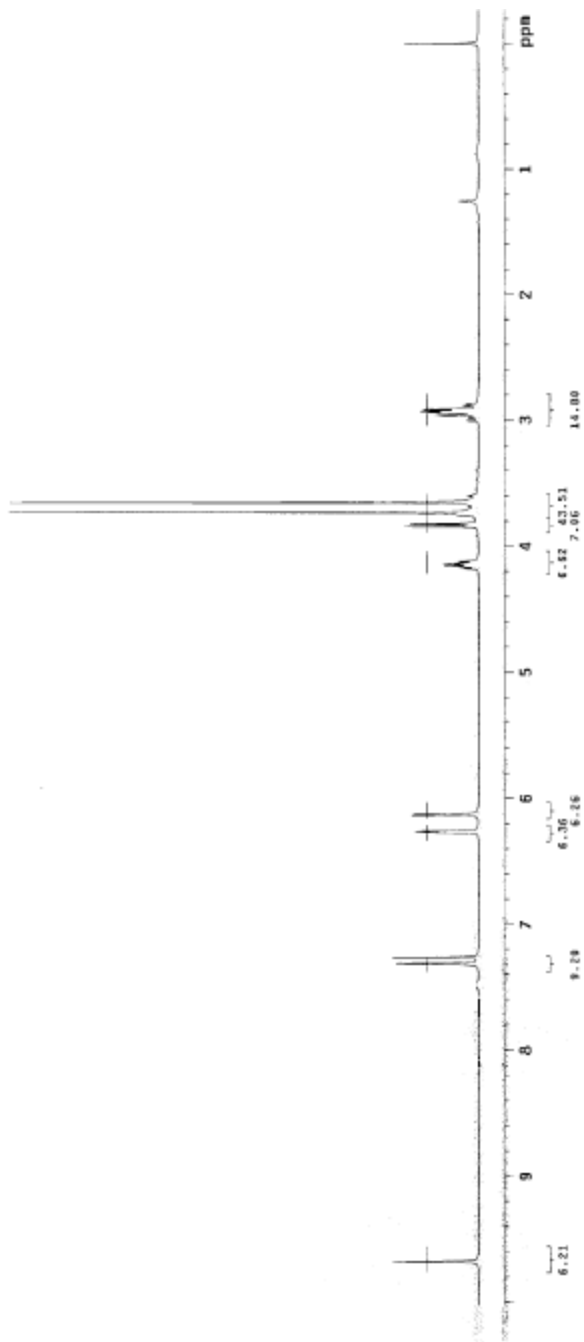

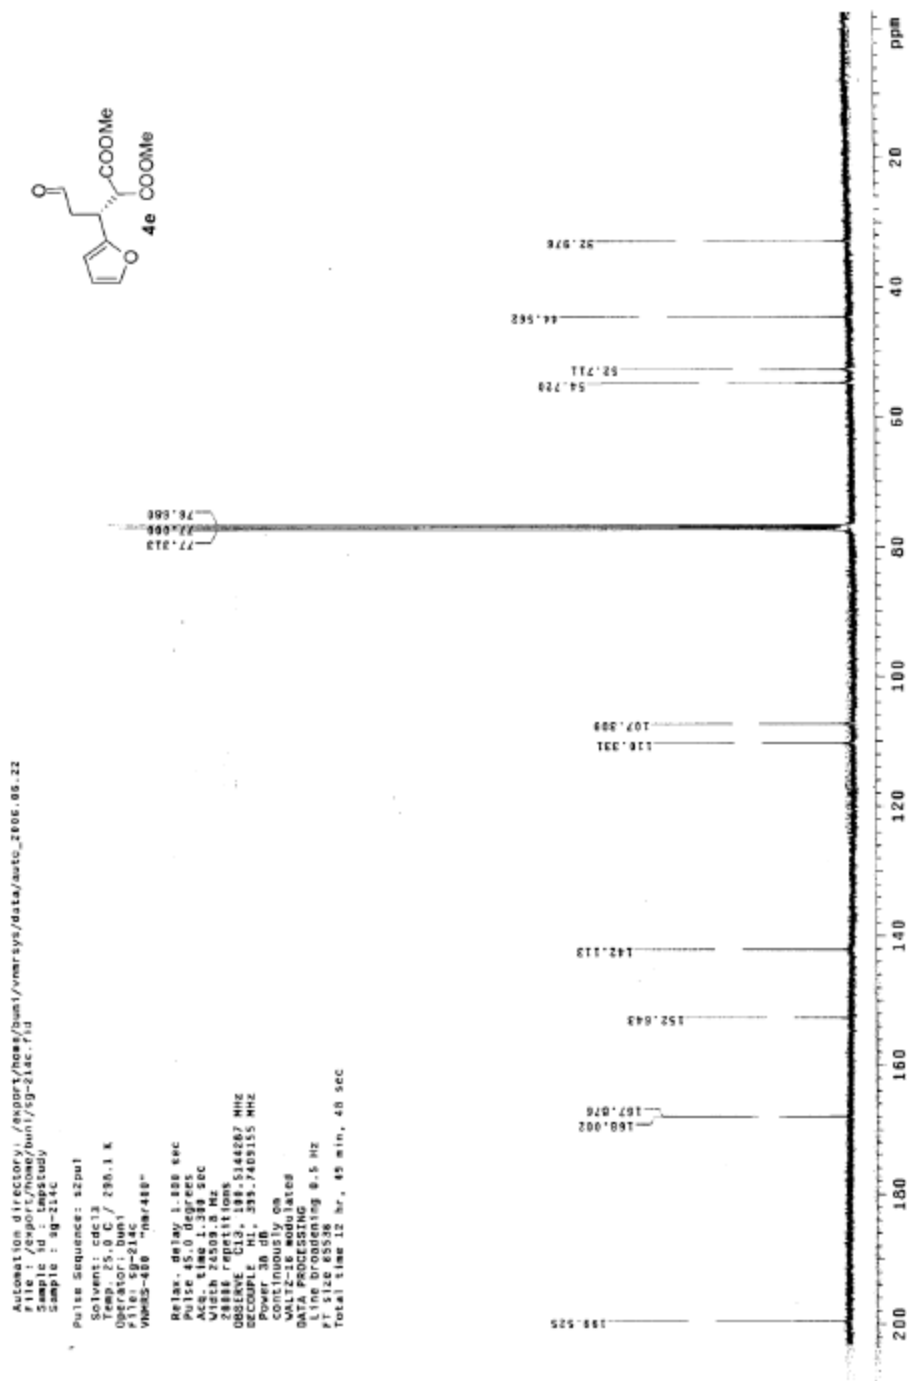

Automation directory: /export/home/buni/vnmrsys/data/auto\_2006.06.22  
File: /export/home/buni/sg-227.fid  
Sample id: tmostudy  
Sample: sg-227

Pulse Sequence: szpul  
Solvent: cdcl3  
Temp: 25.0 C / 298.1 K  
Operator: buni  
File: sg-227  
VNMR5-400 "nmr400"

Relax. delay 1.000 sec  
Pulse 45.0 degrees  
Acq. time 2.049 sec  
Width 6410.3 Hz  
8 repetitions  
OBSERVED F1 399.7389128 MHz  
DATA PROCESSING  
File processing 0.2 Hz  
FT size 65536  
Total time 0 min, 30 sec

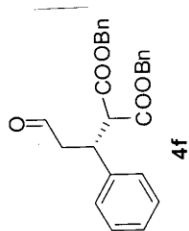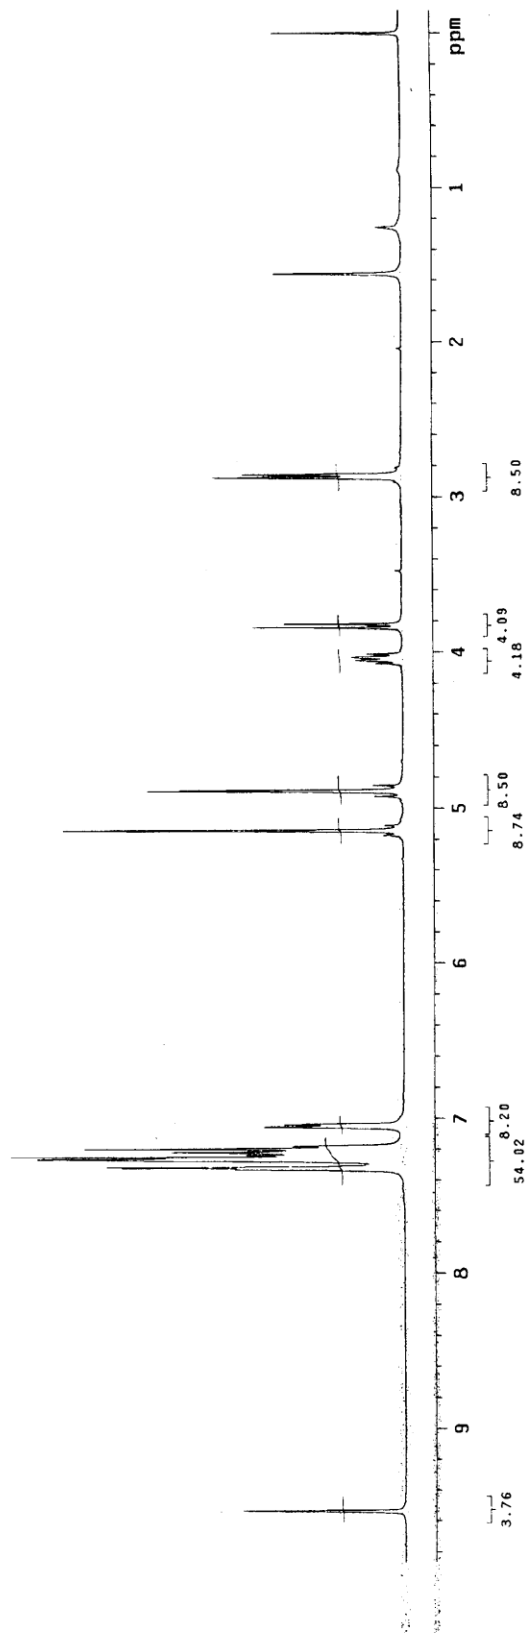

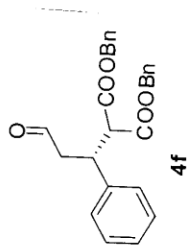

Automation directory: /export/home/buni/vnmrsys/data/auto\_2008.06.22  
File: /export/home/buni/sg-227c.fid

Sample id: tmpstudy  
Sample: sg-227c

Pulse Sequence: s2pul

Solvent: cdcl3  
Temp: 25.0 C / 298.1 K  
Operator: buni  
File: sg-227c  
VNMR-400 "nmr400"

Relax. delay 1.000 sec  
Pulse 45.0 degrees  
Acq. time 1.300 sec  
Width 24509.8 Hz  
Spectral width 31000.000 Hz  
OBSERVE CH1, 399.740155 MHZ  
DECUPLE CH1, 399.740155 MHZ  
Power 38 dB,  
continuously on  
VATZ-16 modulated  
DATA PROCESSING  
Line broadening 0.5 Hz  
FT size 65536  
Total time 12 hr, 49 min, 48 sec

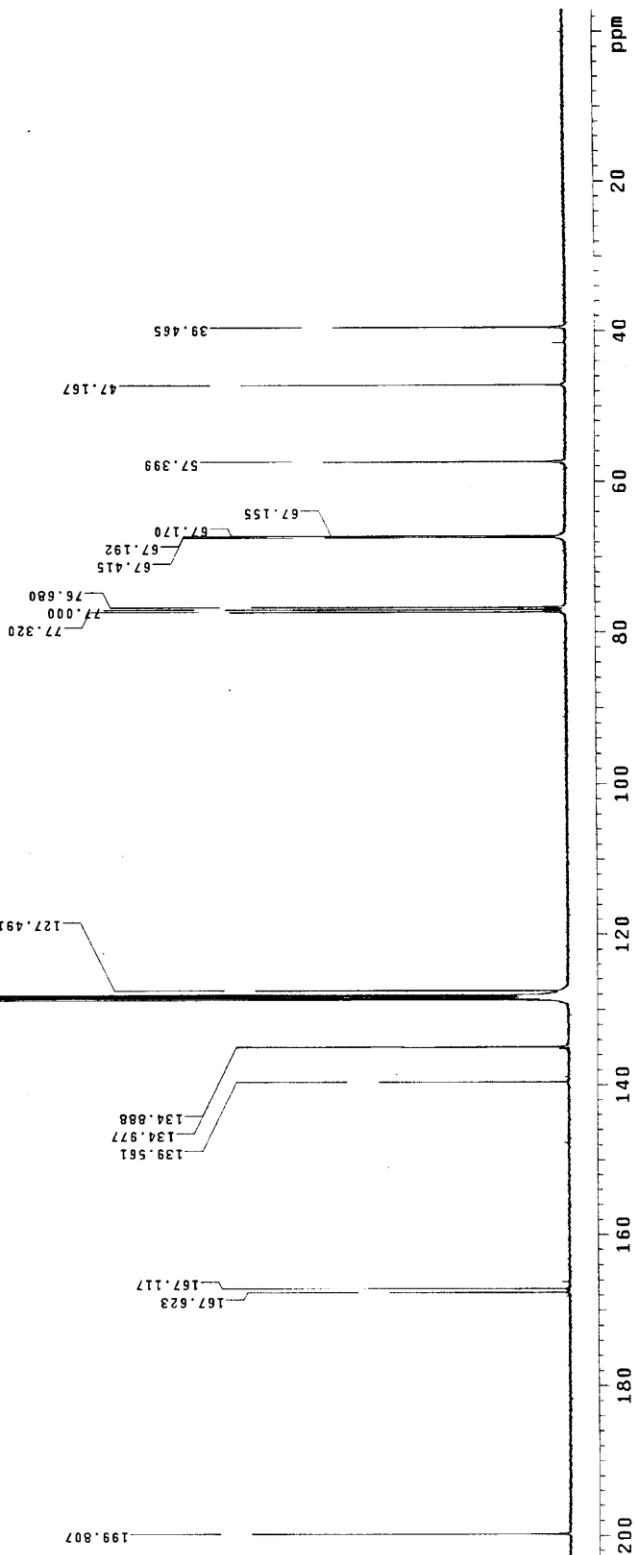

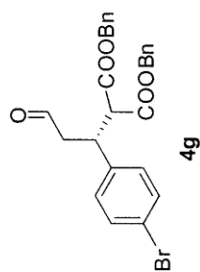

Automation directory: /export/home/bunif/vnmrSYS/data/auto\_2006.06.22  
File: /export/home/bunif/vnmrSYS/data/auto\_2006.06.22  
Sample id: tmpstudy  
Sample: sg-216

Pulse Sequence: szpul  
Solvent: cdcl3  
Temp: 25.0 C / 298.1 K  
Operator: bunif  
File: sg-216  
VNMR-400 "nmr400"

Relax. delay 1.000 sec  
Pulse 45.0 degrees  
Acq. time 2.049 sec  
Width 5410.3 Hz  
8 repetitions  
OBSERVE F1, 399.7369085 MHz  
DATA PROCESSING  
F1 size 65536  
Total time 0 min, 30 sec

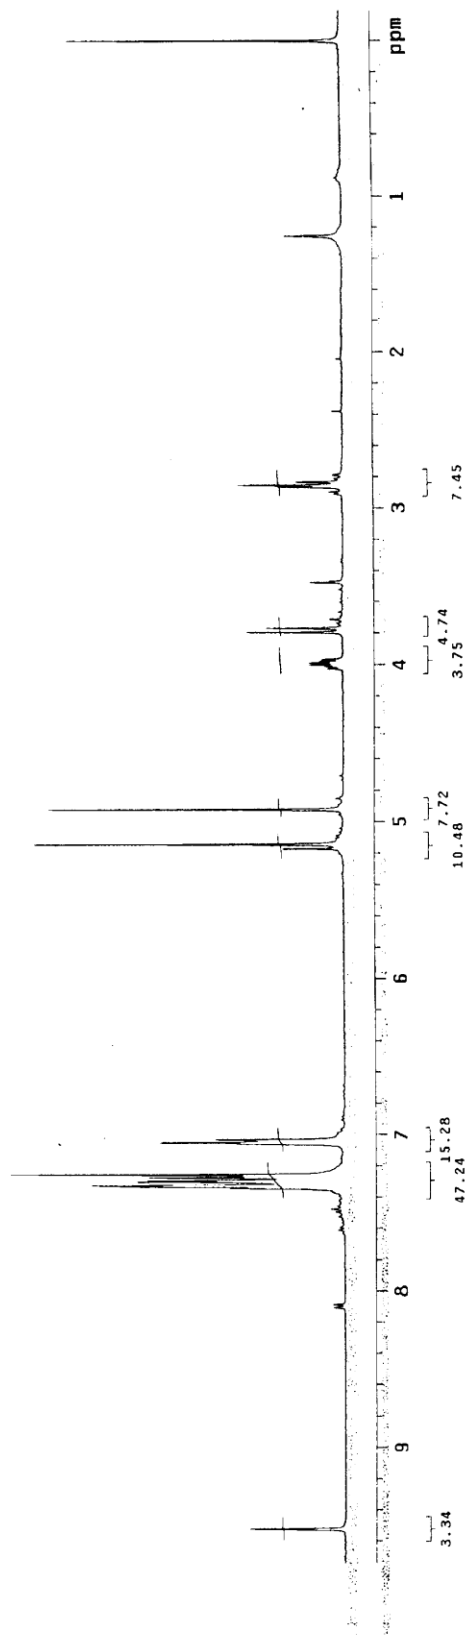

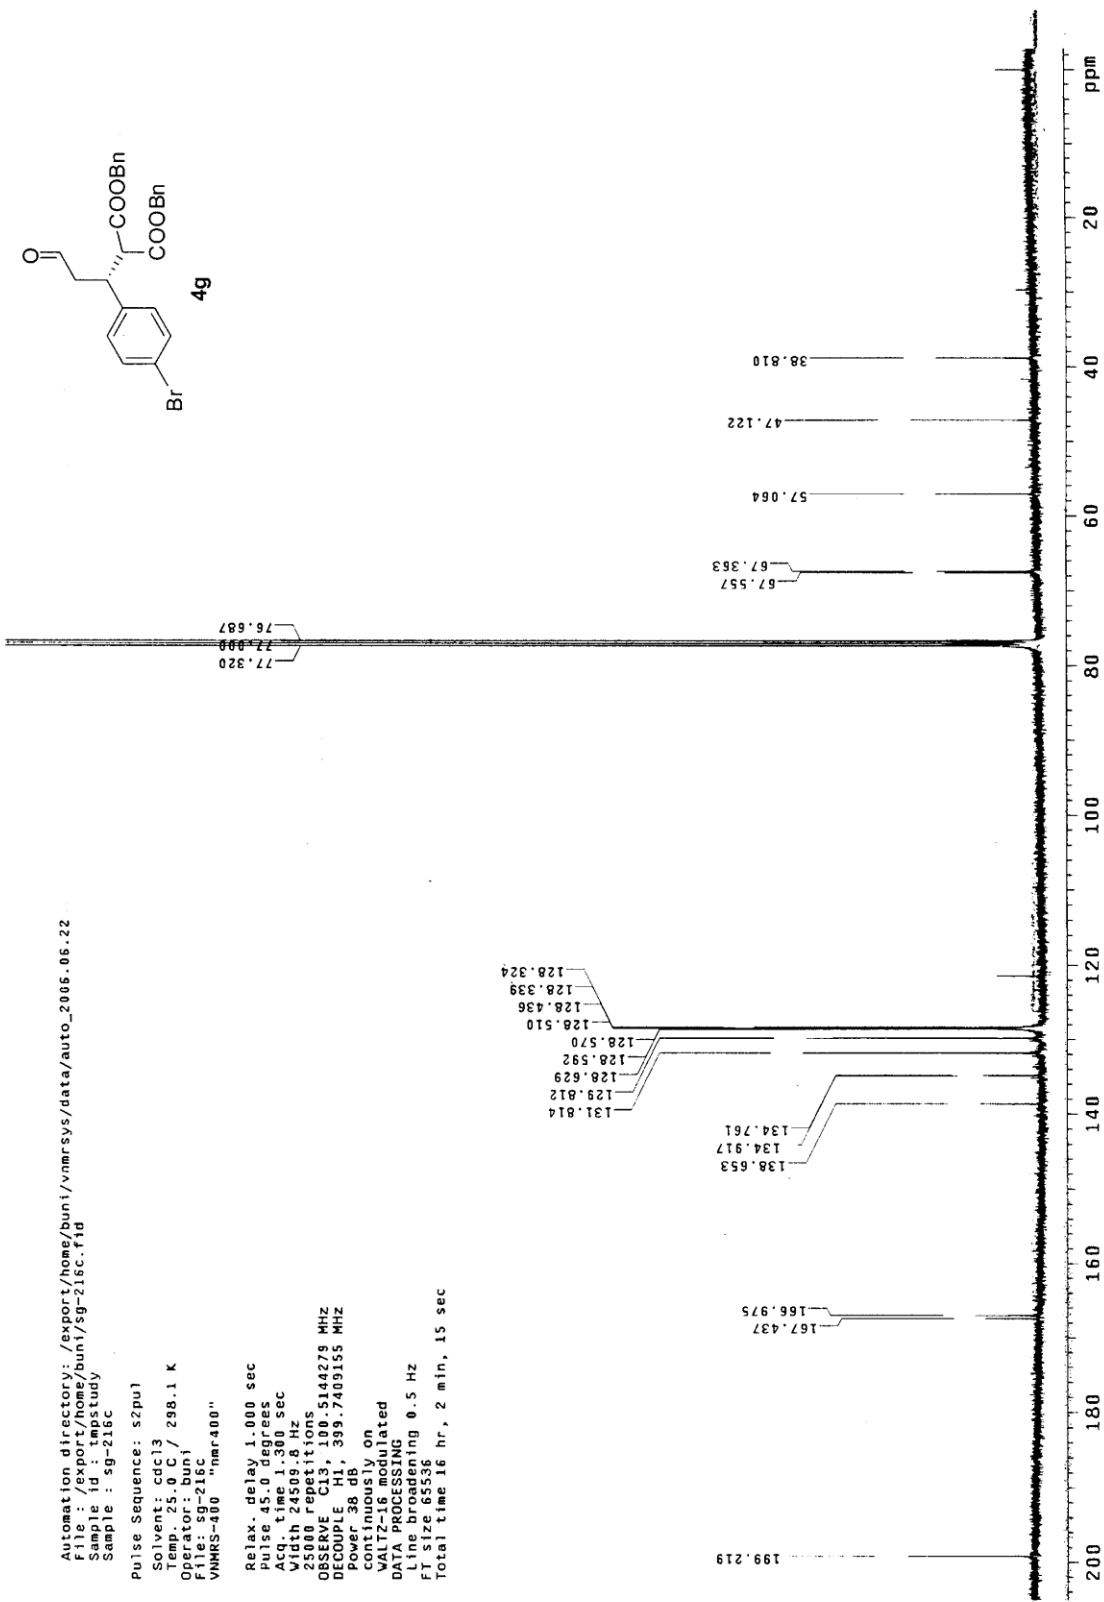

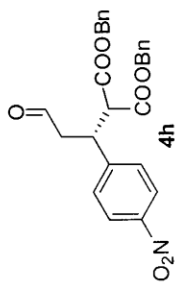

Automation directory: /export/home/walkup/auto\_2012\_06.20  
File: /export/home/bun1/sg-240.fid  
Sample id: tmpstudy  
Sample: sg-240

Pulse Sequence: s2pu1  
Solvent: cdcl3  
Temp: 25.0 C / 298.1 K  
Operator: bun1  
File: sg-240  
VNMRS-400 "nmr400"

Relax. delay 1.000 sec  
Pulse 45.0 degrees  
Acq. time 2.049 sec  
Width 6410.3 Hz  
8 repetitions  
OBSERVE H1, 399.7389105 MHz  
DATA PROCESSING  
Line broadening 0.2 Hz  
FT size 65536  
Total time 0 min, 30 sec

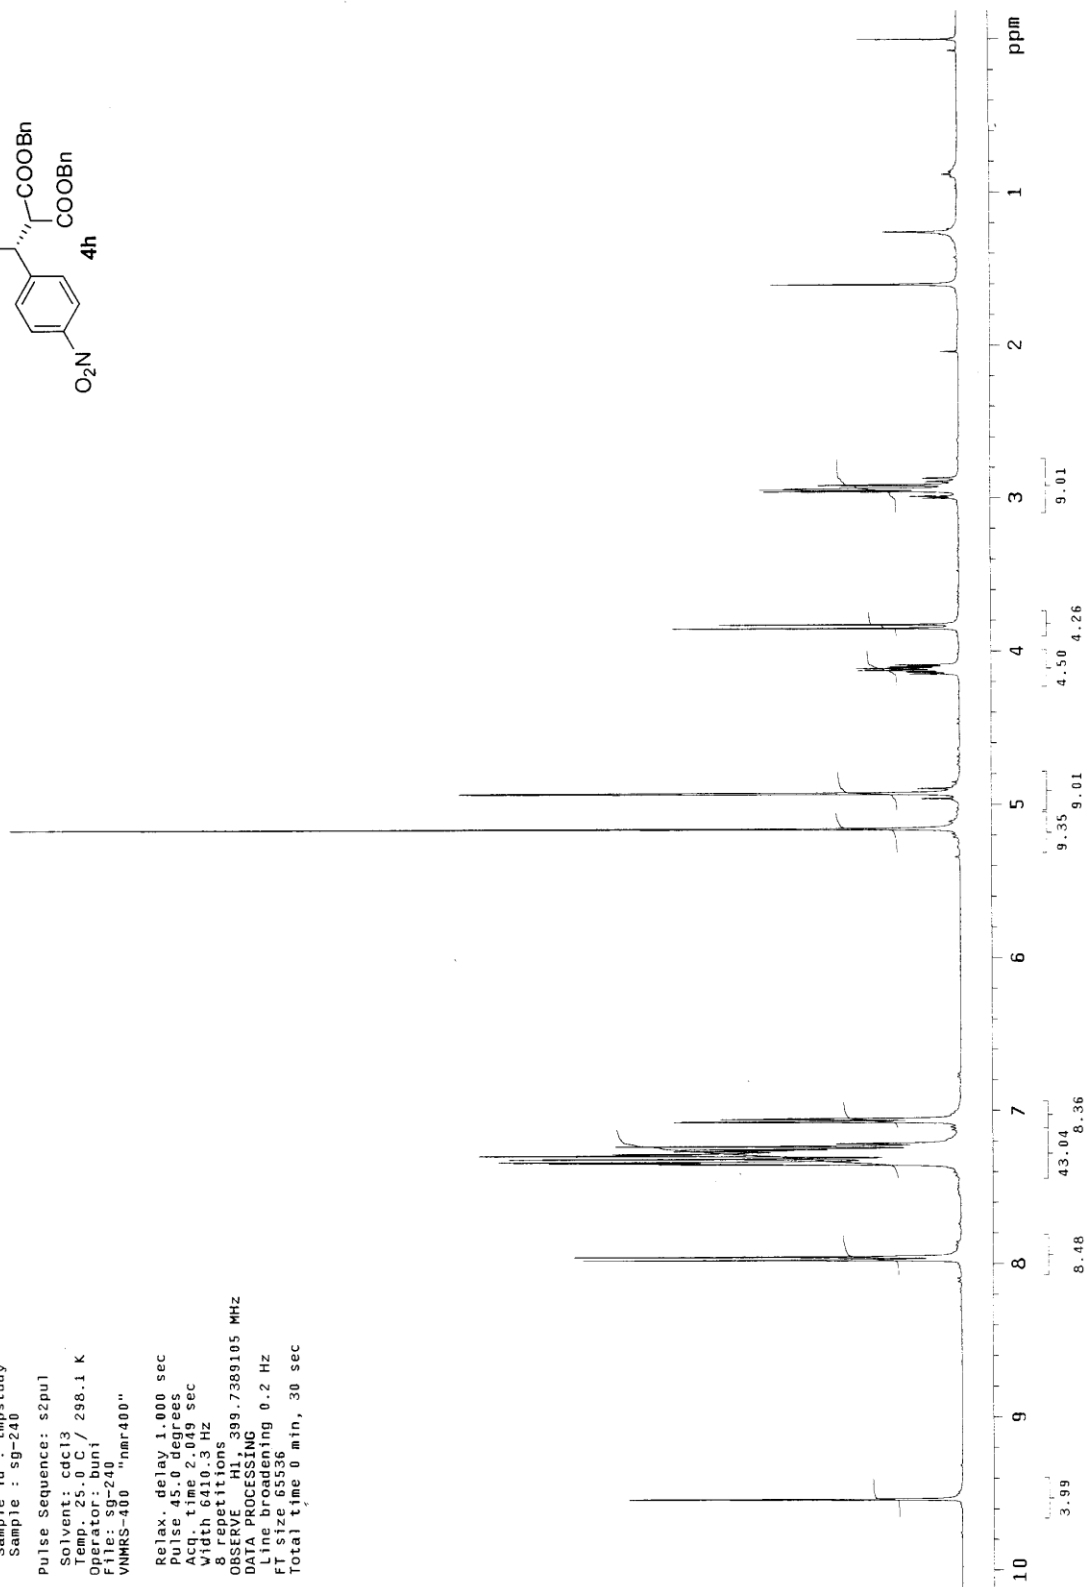



Automation directory: /export/home/bunl/vnmrsvs/data/auto\_2006\_06.22  
File: /export/home/bunl/vnmrsvs/data/sg-240c.fid  
Sample id: tmpstudy  
Sample: sg-240c

Pulse Sequence: s2pul  
Solvent: cdcl3  
Temp: 25.00 C / 298.1 K  
Operator: bunl  
File: sg-240c  
VNMR-400 "nmr-400"

Relax. delay: 1.000 sec  
Pulse: 45.0 degrees  
Acq. time: 1.300 sec  
Width: 24509.8 Hz  
20000 repetitions  
OBSERVE C13, 100.5144339 MHz  
DECOUPLE H1, 399.7409155 MHz  
Power: 38 dB  
continuously on  
WALTZ-16 modulated  
DATA PROCESSING  
Line broadening: 0.5 Hz  
F1 size: 83509  
Total time: 12 hr, 49 min, 48 sec

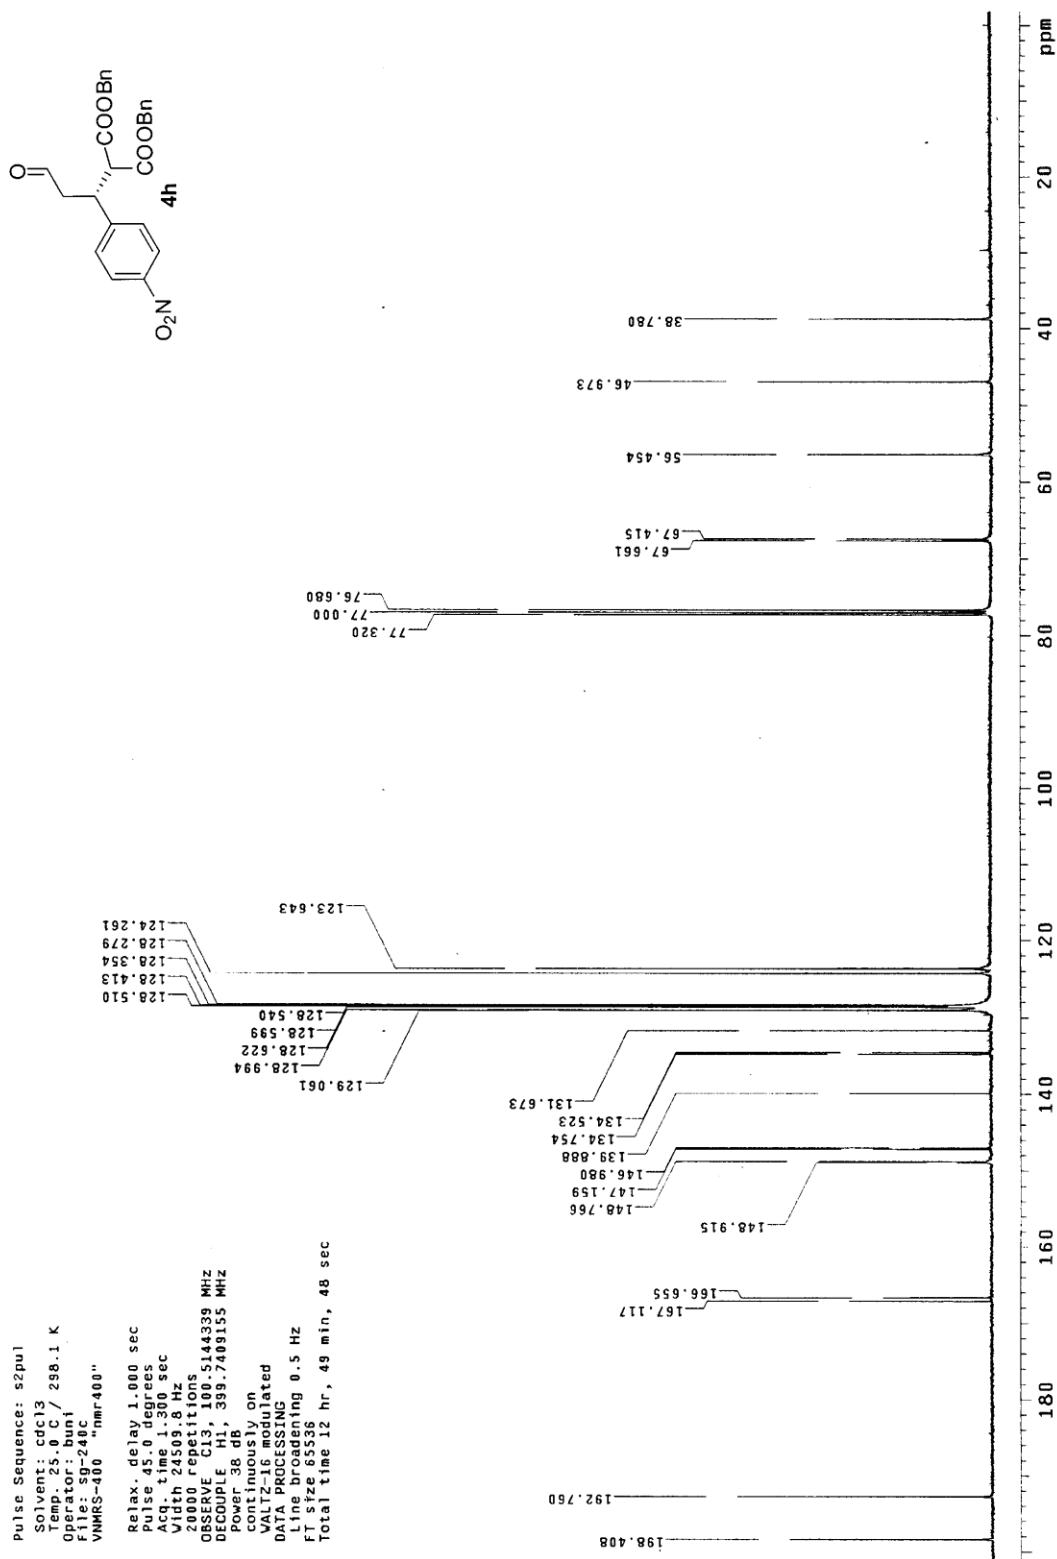

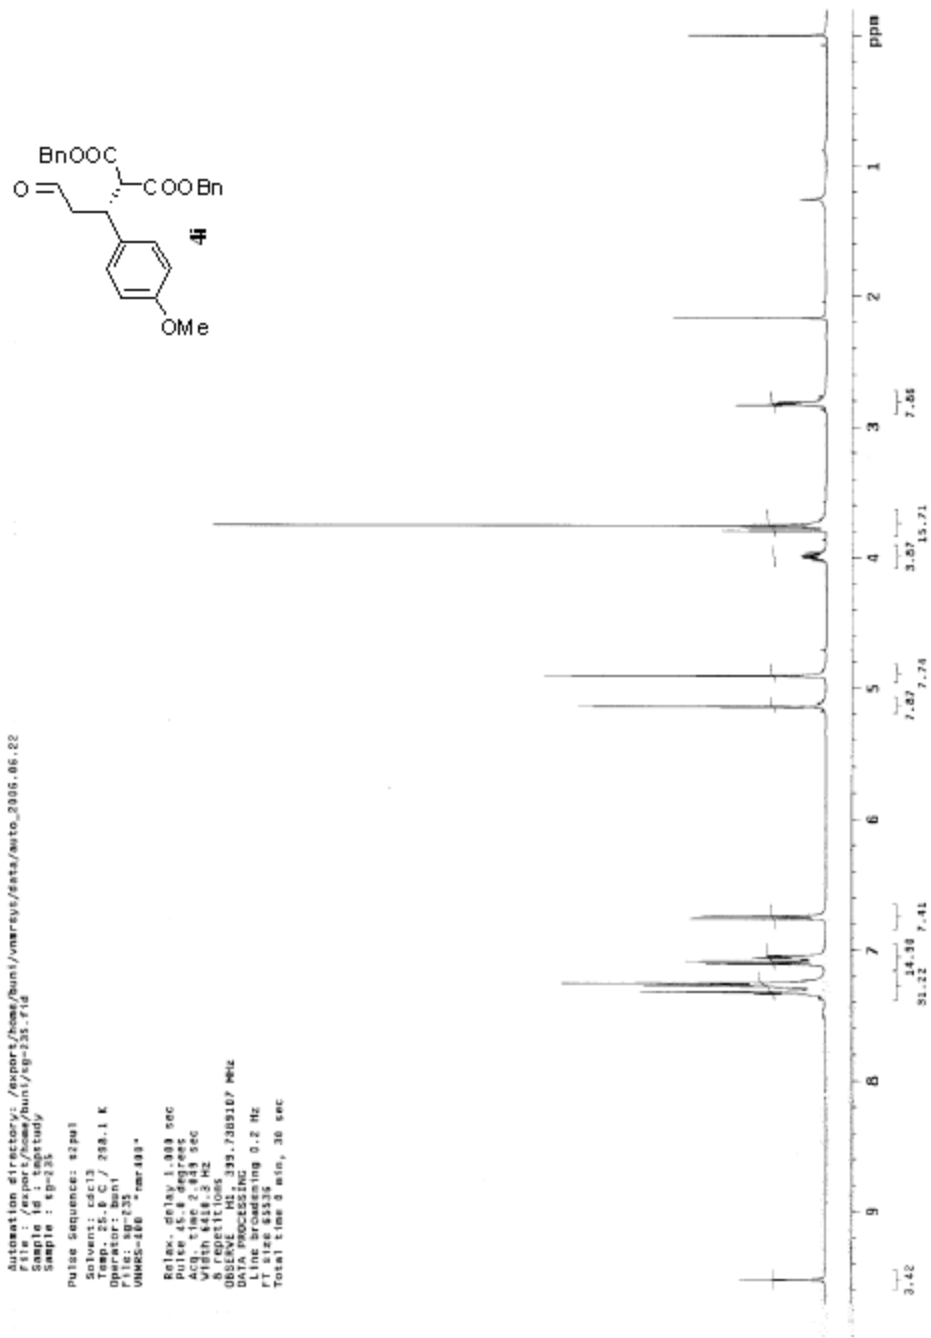

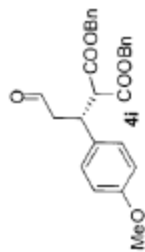

Automation directory: /export/home/sumi/vnmrsys/data/aut\_2006\_04\_22  
 File: /export/home/sumi/vnmrsys/data/aut\_2006\_04\_22  
 Sample ID: 4j-233c  
 Sample: 4j-233c

Pulse Sequence: zgpg30  
 Solvent: dms-d6  
 Temp: 25.3 C / 250.1 K  
 Observed: 300  
 File: 4j-233c  
 VNAME: 4j-233c "nmr466"

Relax. delay: 1.000 sec  
 Pulse: 45.0 degrees  
 C13: 100.625 MHz  
 C13: 100.625 MHz  
 Width: 24548.8 Hz  
 26000 Repetitions  
 OBSERVE: C13, 100.625 MHz  
 DECOUPLE: H1, 500.136 MHz  
 Acquisition on  
 CONTINUOUSLY on  
 VOLTAGE: 19.000 V  
 DATA PROCESSING  
 Line broadening: 6.5 Hz  
 Frequency offset: 0.000 Hz  
 Total time: 22 hr, 09 min, 48 sec

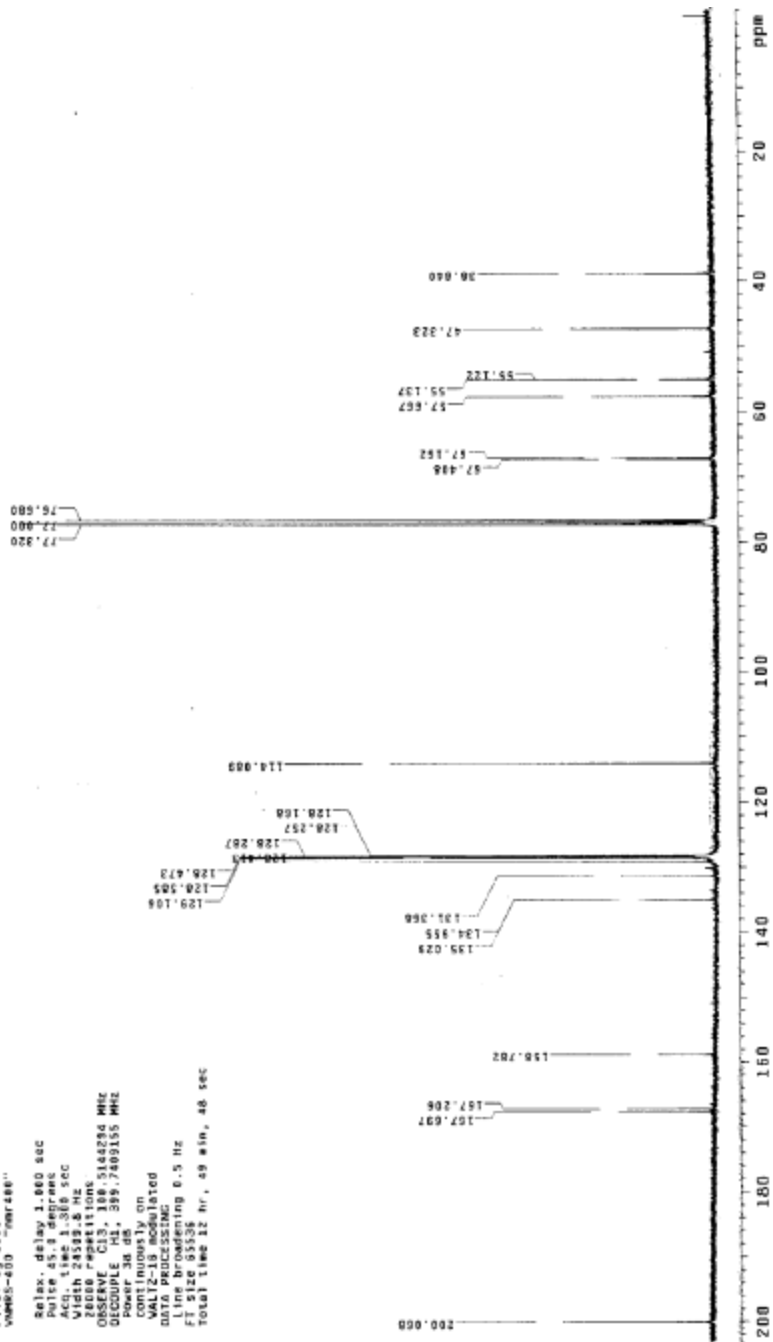

Automation directory: /export/home/bunt/vnmrpy/data/auto\_2012.06.22

File: /export/home/bunt/vnmrpy/data/auto\_2012.06.22

Sample id: 1: teststudy

Sample: 1: sp-234

Pulse sequence: zgpg30

Solvent: cdcl3

Temp: 25.0 C / 296.1 K

Operator: bunt

File: /export/home/bunt/vnmrpy/data/auto\_2012.06.22

VNMR-2D: vnmr43g\*

Relax: delay 1.000 sec

Pulse: 45.0 degrees

Acq: time 2.043 sec

RG: 655.360 Hz

8: FIDRES11.000 Hz

DDSERVE: H1: 333.7349505 MHz

DATA PROCESSING

FT size: 65536

FT size: 65536

Total time: 8 min, 30 sec

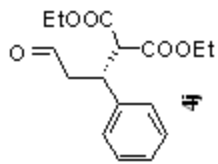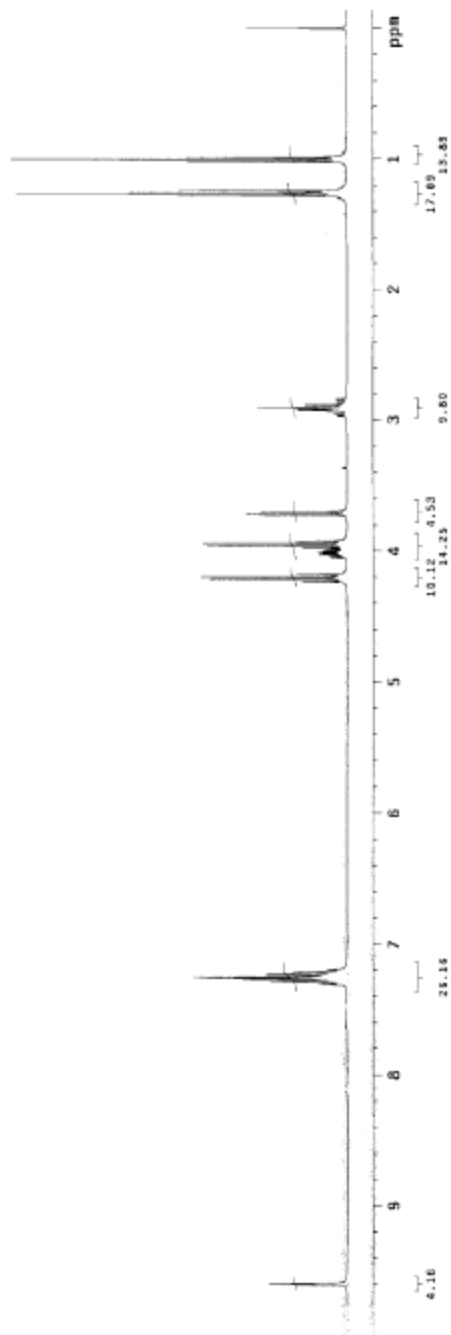

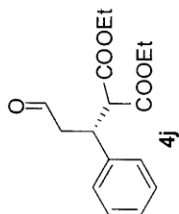

Automation directory: /export/home/buni/vnmrsys/data/auto\_2006.0c.22  
File: /export/home/buni/sg-234c.fid  
Sample id: tmpstudy  
Sample : sg-234c

Pulse Sequence: s2pul  
Solvent: cdcl3  
Temp: 25.0 C / 298.1 K  
Operator: buni  
File: sg-234c  
VNMR-400 "nmr400"

Relax. delay 1.000 sec  
Pulse 45.0 degrees  
Acq. time 1.300 sec  
Width 24500.0 Hz  
OBSERVE CH 100.5144287 MHz  
DECUPLE CH 1, 399.7409155 MHz  
Power 38 dB  
continuously on  
WALTZ-16 modulated  
DATA PROCESSING  
Line broadening 0.5 Hz  
FT size 65536  
Total time 12 hr, 49 min, 48 sec

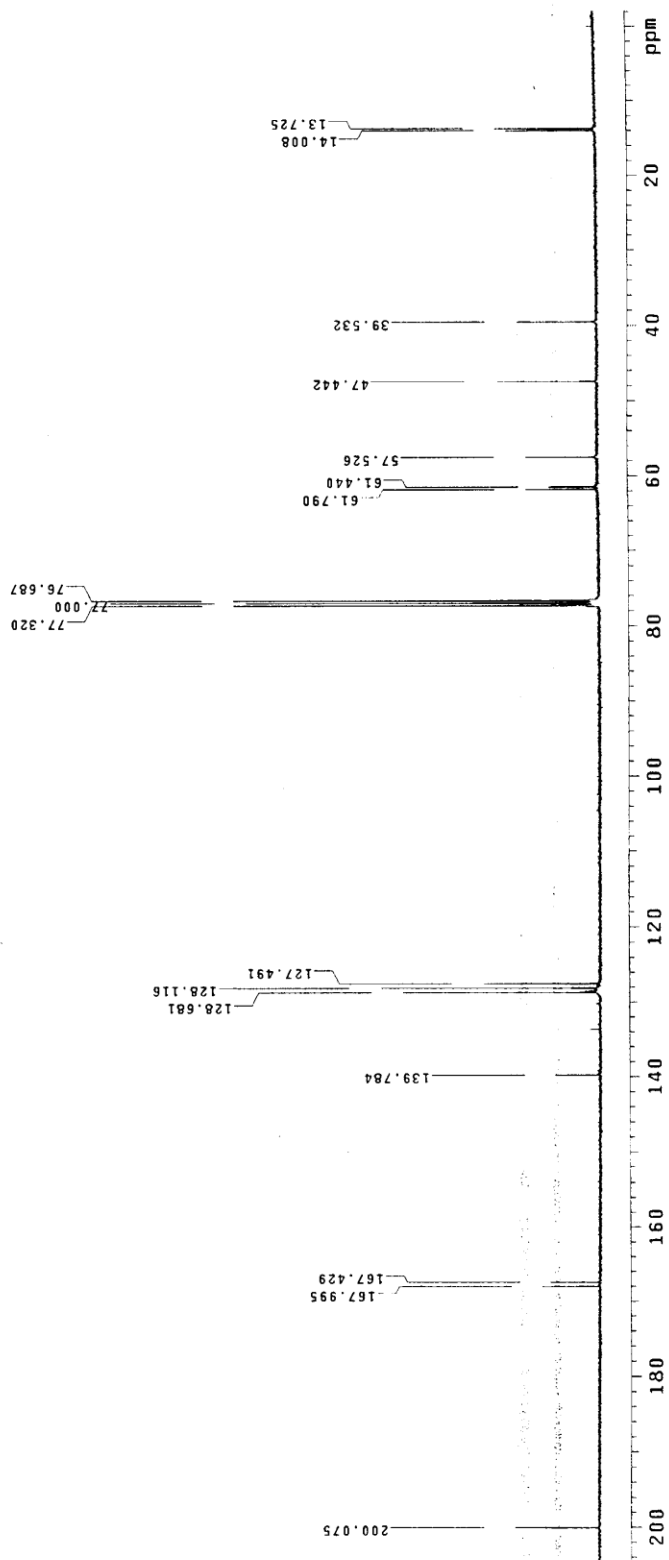

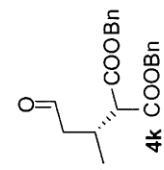

Automation directory: /export/home/bun1/vnmrsys/data/aut0\_2006.06.22  
File: /export/home/bun1/vnmrsys/data/aut0\_2006.06.22  
Sample id: tmpstudy  
Sample: sg-239

Pulse Sequence: s2pu1  
Solvent: cdcl3  
Temp: 25.0 C / 298.1 K  
Operator: bun1  
File: sg-239  
VNMRS-400 "nmr400"

Relax. delay 1.000 sec  
Pulse 45.0 degrees  
Acq. time 2.049 sec  
F1 freq 99.626 MHz  
& resolution 0.08 Hz  
OBSERVE H1 399.7369099 MHz  
DATA PROCESSING  
Line broadening 0.2 Hz  
FT size 65536  
Total time 0 min, 30 sec

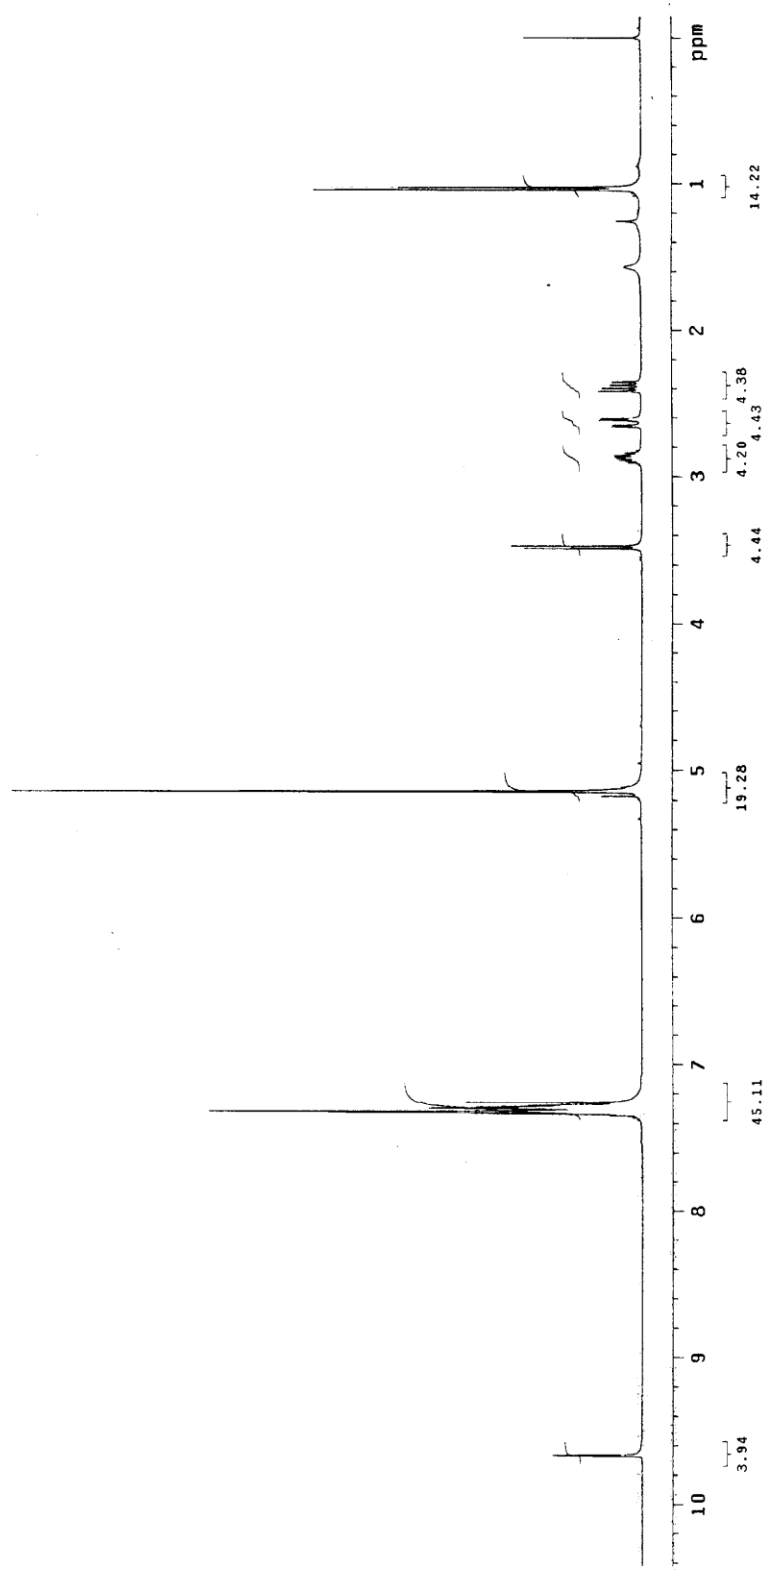

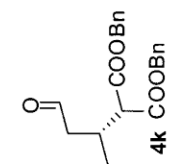

Automation directory: /export/home/bun1/vnmrSYS/data/au0\_2006.06.22  
File: /export/home/bun1/sg-239c.fid  
Sample id: tmpstudy  
Sample: sg-239c

Pulse Sequence: s2pu1  
Solvent: cdCl3  
Temp: 25.0 C / 298.1 K  
Operator: bun1  
File: sg-239c  
VNMRS-400 "nmr400"

Relax. delay 1.000 sec  
Pulse 45.0 degrees  
Acq. time 1.300 sec  
Width 24509.6 Hz  
Virt. Recit: 1.05  
OBSERVE C13, 100.5144294 MHz  
DECUPLE H1, 399.7409155 MHz  
Power 38 dB,  
continuously on  
WALTZ-16 modulated  
DATA PROCESSING  
Line broadening 0.5 Hz  
FT size 65536  
Total time 9 hr, 37 min, 21 sec

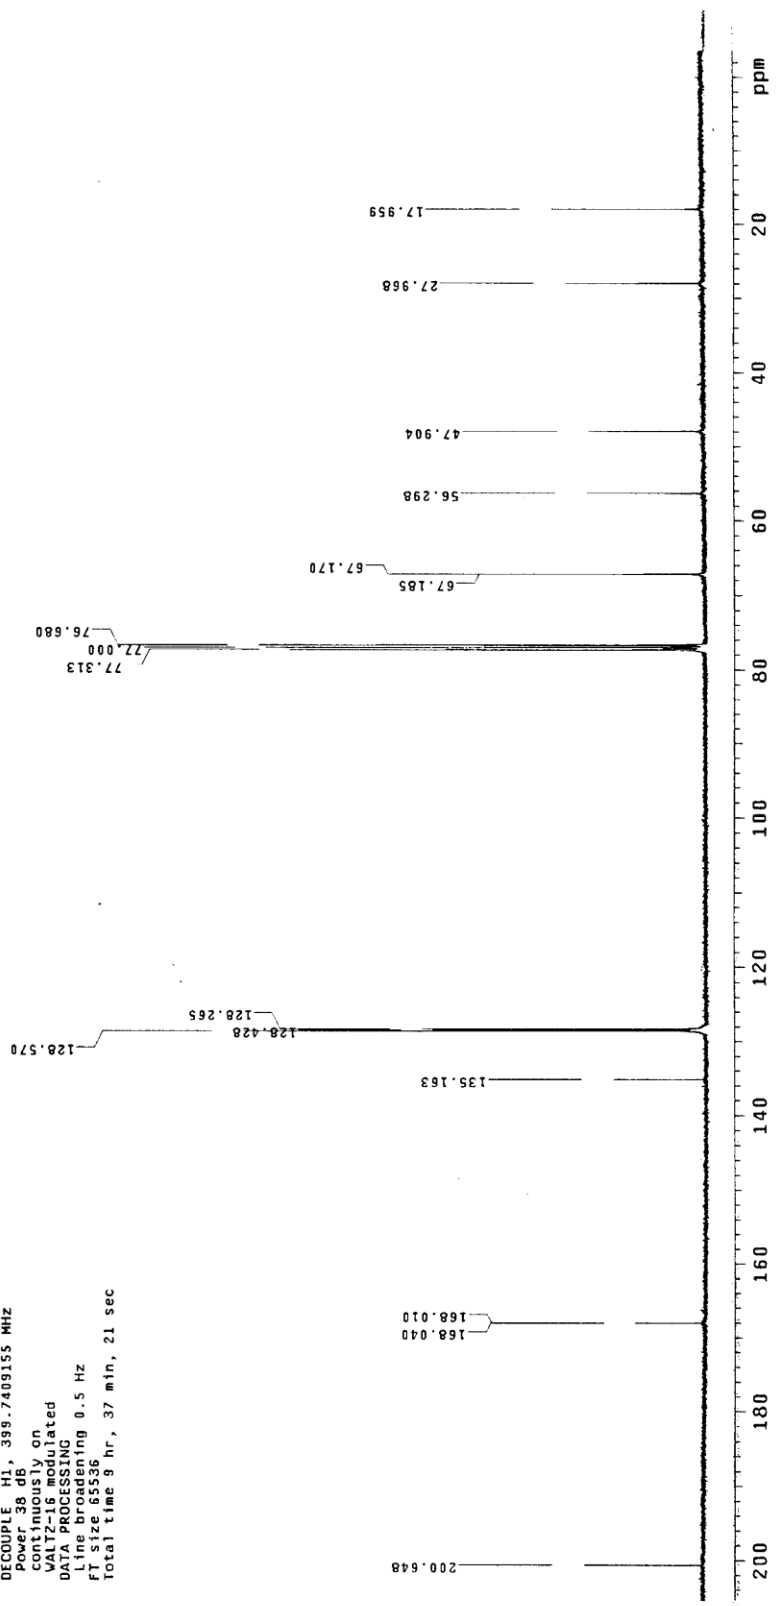

6/28/2012 16:43:36 1 / 1

## ==== Shimadzu LCsolution Analysis Report ====

C:\LabSolutions\Data\subrata\k-2-4.lcd

Acquired by : Admin  
Sample Name : k-2-4  
Sample ID : k-2-4  
Vial # :  
Injection Volume : 5 uL  
Data File Name : k-2-4.lcd  
Method File Name : 80%-Hexane-20%-isopropanol-35min (0.5 mL, 254nm).lcm  
Batch File Name :  
Report File Name : Default.lcr  
Data Acquired : 12/21/2009 7:59:28 PM  
Data Processed : 4/5/2010 5:09:13 PM

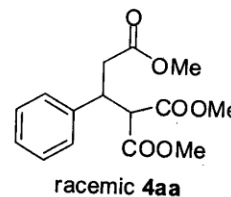

### <Chromatogram>

PeakTable

Detector A Ch1 254nm

| Peak# | Ret. Time | Area    | Height | Area %  | Height % |
|-------|-----------|---------|--------|---------|----------|
| 1     | 14.490    | 988607  | 21203  | 50.420  | 51.424   |
| 2     | 16.469    | 972126  | 20029  | 49.580  | 48.576   |
| Total |           | 1960733 | 41232  | 100.000 | 100.000  |

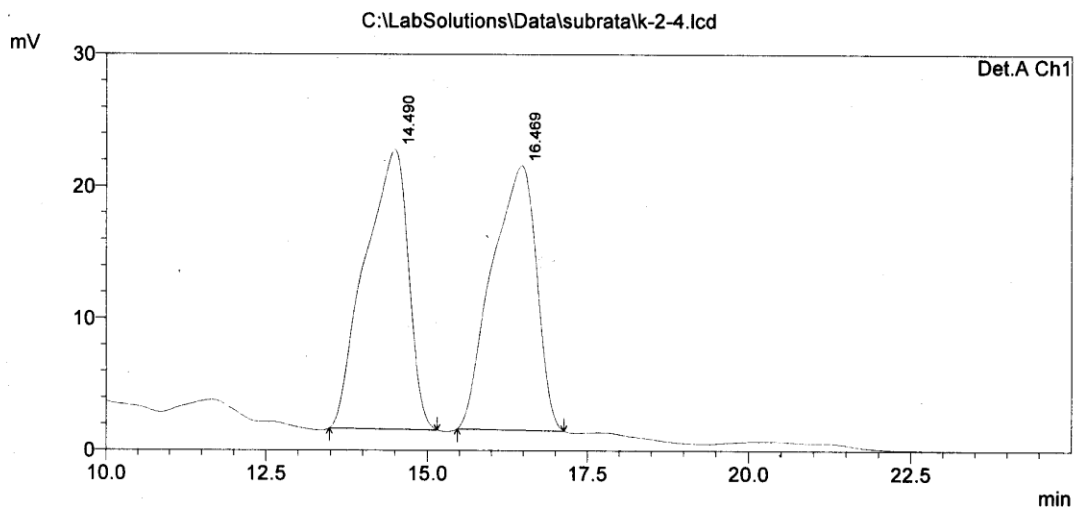



6/28/2012 16:30:43 1 / 1

==== Shimadzu LCsolution Analysis Report ====

C:\LabSolutions\Data\subrata\sg-208-1E.lcd  
Acquired by : Admin  
Sample Name : sg-208-1E  
Sample ID : sg-208-1E  
Vail # :  
Injection Volume : 5 uL  
Data File Name : sg-208-1E.lcd  
Method File Name : 80%-Hexane-20%-isopropanol-35min (0.5 mL, 254nm).lcm  
Batch File Name :  
Report File Name : Default.lcr  
Data Acquired : 12/29/2009 8:04:58 PM  
Data Processed : 12/29/2009 9:07:25 PM

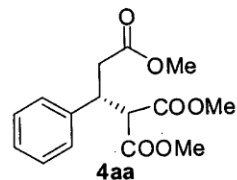

<Chromatogram>

PeakTable

Detector A Ch1 254nm

| Peak# | Ret. Time | Area    | Height | Area %  | Height % |
|-------|-----------|---------|--------|---------|----------|
| 1     | 14.509    | 2275501 | 48098  | 96.831  | 96.216   |
| 2     | 16.480    | 74461   | 1891   | 3.169   | 3.784    |
| Total |           | 2349962 | 49990  | 100.000 | 100.000  |

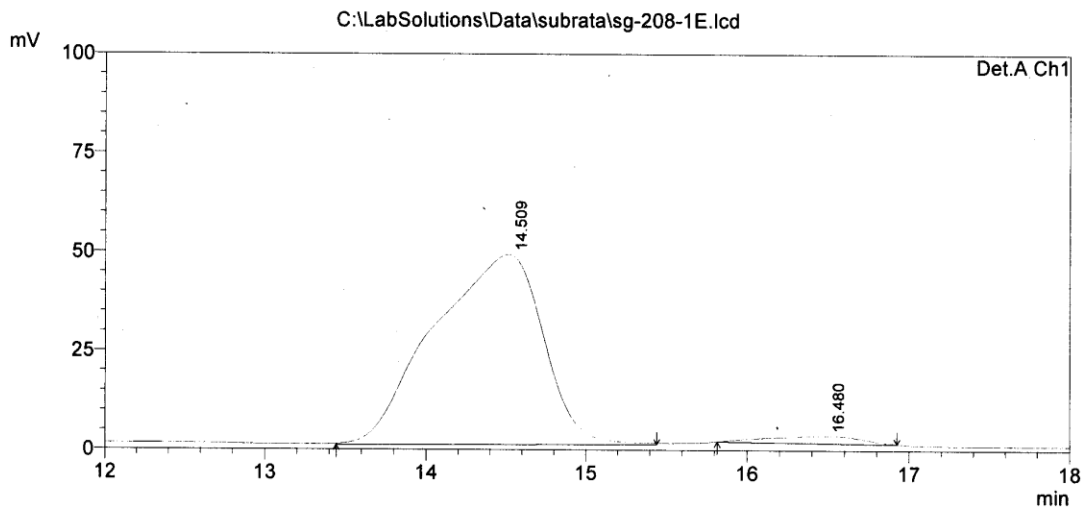

## ==== Shimadzu LCsolution Analysis Report ====

C:\LabSolutions\Data\subrata\k-2-13-3c.lcd

Acquired by : Admin  
Sample Name : k-2-13-3c  
Sample ID : k-2-13-3c  
Vial # :  
Injection Volume : 5 uL  
Data File Name : k-2-13-3c.lcd  
Method File Name : 70%-Hexane-30%-isopropanol-30min (1.0mL, 220nm).lcm  
Batch File Name :  
Report File Name : Default.lcr  
Data Acquired : 1/31/2010 3:34:49 PM  
Data Processed : 4/5/2010 4:07:17 PM

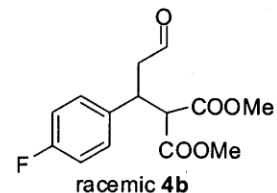

### <Chromatogram>

PeakTable

Detector A Ch1 220nm

| Peak# | Ret. Time | Area     | Height | Area %  | Height % |
|-------|-----------|----------|--------|---------|----------|
| 1     | 32.144    | 5189746  | 78038  | 50.113  | 51.279   |
| 2     | 36.265    | 5166438  | 74146  | 49.887  | 48.721   |
| Total |           | 10356184 | 152184 | 100.000 | 100.000  |

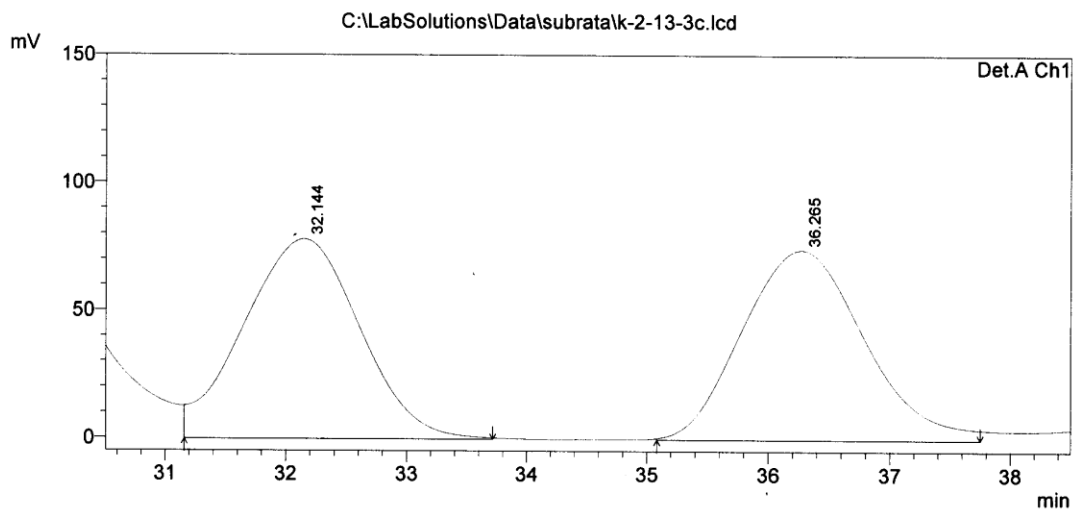

6/28/2012 16:34:52 1 / 2

## ==== Shimadzu LCsolution Analysis Report ====

C:\LabSolutions\Data\subrata\sg-215a.lcd

Acquired by : Admin  
Sample Name : sg-215a  
Sample ID : sg-215a  
Vial # :  
Injection Volume : 5 uL  
Data File Name : sg-215a.lcd  
Method File Name : 70%-Hexane-30%-isopropanol-30min (1.0mL, 220nm).lcm  
Batch File Name :  
Report File Name : Default.lcr  
Data Acquired : 1/31/2010 4:22:20 PM  
Data Processed : 1/31/2010 5:17:37 PM

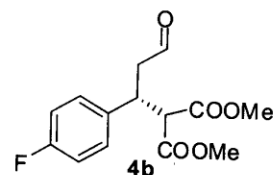

### <Chromatogram>

PeakTable

| Peak# | Ret. Time | Area    | Height | Area %  | Height % |
|-------|-----------|---------|--------|---------|----------|
| 1     | 32.139    | 6750767 | 100576 | 97.561  | 96.781   |
| 2     | 36.577    | 168739  | 3345   | 2.439   | 3.219    |
| Total |           | 6919507 | 103921 | 100.000 | 100.000  |

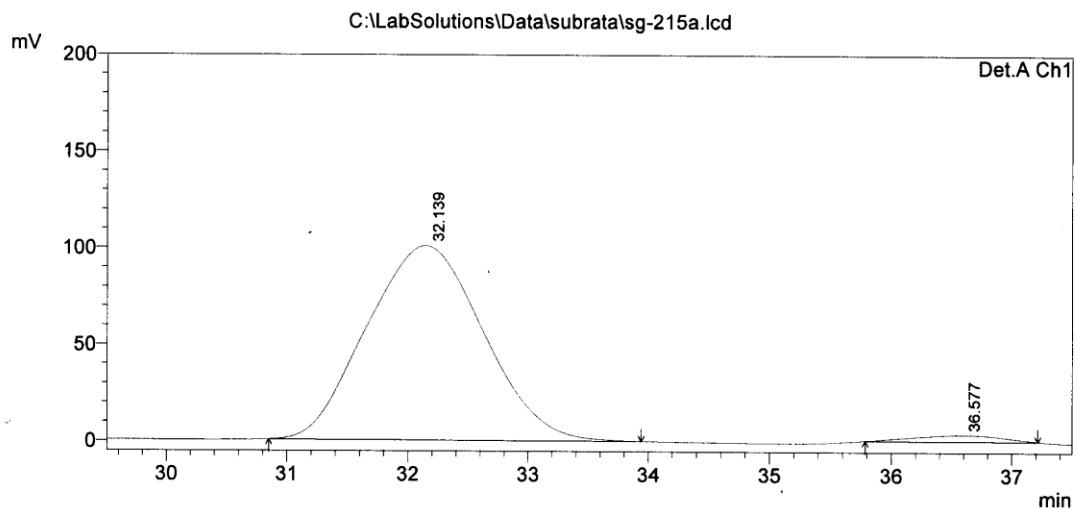

6/28/2012 16:33:14 1 /

### ==== Shimadzu LCsolution Analysis Report ====

C:\LabSolutions\Data\subrata\k-2-12.lcd

Acquired by : Admin  
Sample Name : k-2-12  
Sample ID : k-2-12  
Vail # :  
Injection Volume : 5 uL  
Data File Name : k-2-12.lcd  
Method File Name : 80%-Hexane-20%-isopropanol-35min (0.5 mL, 254nm).lcm  
Batch File Name :  
Report File Name : Default.lcr  
Data Acquired : 1/20/2010 9:04:13 PM  
Data Processed : 6/9/2010 5:45:31 PM

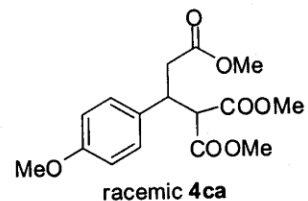

#### <Chromatogram>

PeakTable

Detector A Ch1 254nm

| Peak# | Ret. Time | Area    | Height | Area %  | Height % |
|-------|-----------|---------|--------|---------|----------|
| 1     | 18.609    | 679119  | 13826  | 51.006  | 53.289   |
| 2     | 24.759    | 652329  | 12119  | 48.994  | 46.711   |
| Total |           | 1331448 | 25946  | 100.000 | 100.000  |

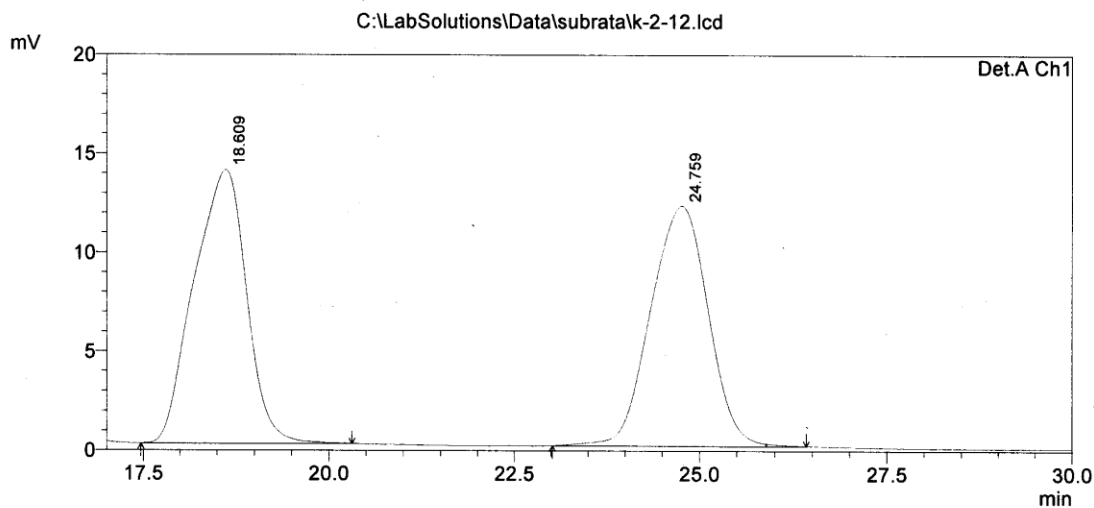

6/28/2012 16:33:43 1 / 1

## ==== Shimadzu LCsolution Analysis Report ====

C:\LabSolutions\Data\subrata\sg-221.lcd

Acquired by : Admin  
Sample Name : sg-221  
Sample ID : sg-221  
Vial # :  
Injection Volume : 5 uL  
Data File Name : sg-221.lcd  
Method File Name : 80%-Hexane-20%-isopropanol-35min (0.5 mL, 254nm).lcm  
Batch File Name :  
Report File Name : Default.lcr  
Data Acquired : 1/20/2010 8:06:50 PM  
Data Processed : 4/24/2010 4:34:57 PM

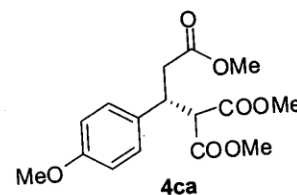

### <Chromatogram>

Detector A Ch1 254nm

PeakTable

| Peak# | Ret. Time | Area    | Height | Area %  | Height % |
|-------|-----------|---------|--------|---------|----------|
| 1     | 18.646    | 2750045 | 50757  | 95.473  | 95.150   |
| 2     | 24.788    | 130391  | 2587   | 4.527   | 4.850    |
| Total |           | 2880436 | 53344  | 100.000 | 100.000  |

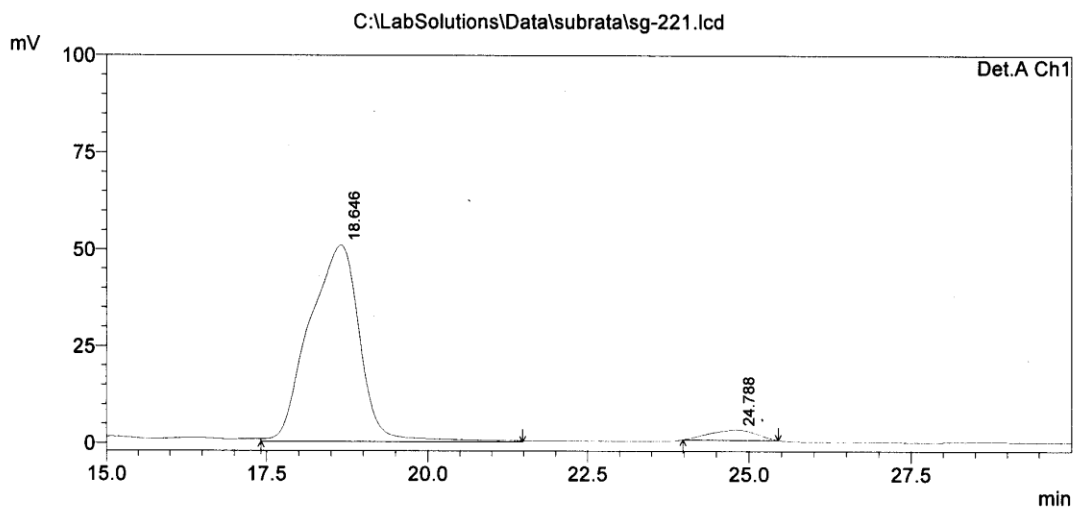

6/28/2012 16:32:17 1 / 2

## ==== Shimadzu LCsolution Analysis Report ====

C:\LabSolutions\Data\subrata\k-1-91.lcd

Acquired by : Admin  
Sample Name : k-1-91  
Sample ID : k-1-91  
Vail # :  
Injection Volume : 5 uL  
Data File Name : k-1-91.lcd  
Method File Name : hexane-isopropanol(70-30)-30min (254nm, 0.7 mL).lcm  
Batch File Name :  
Report File Name : Default.lcr  
Data Acquired : 11/17/2009 9:33:12 PM  
Data Processed : 6/10/2010 4:25:36 PM

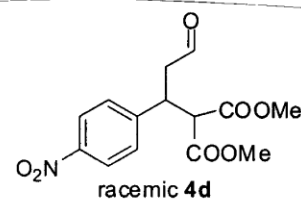

### <Chromatogram>

PeakTable

Detector A Ch1 254nm

| Peak# | Ret. Time | Area     | Height  | Area %  | Height % |
|-------|-----------|----------|---------|---------|----------|
| 1     | 18.176    | 30371976 | 749794  | 49.400  | 47.645   |
| 2     | 19.601    | 31109325 | 823925  | 50.600  | 52.355   |
| Total |           | 61481301 | 1573719 | 100.000 | 100.000  |

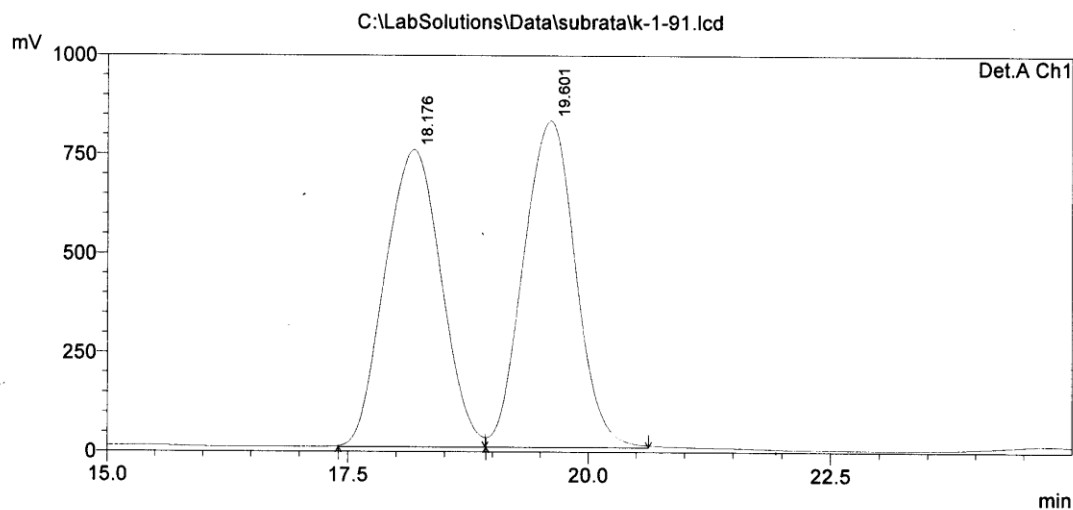

## ==== Shimadzu LCsolution Analysis Report ====

C:\LabSolutions\Data\subrata\k-1-77.lcd

Acquired by : Admin  
Sample Name : k-1-77  
Sample ID : k-1-77  
Vial # :  
Injection Volume : 5 uL  
Data File Name : k-1-77.lcd  
Method File Name : hexane-isopropanol(70-30)-30min (254nm, 0.7 mL).lcm  
Batch File Name :  
Report File Name : Default.lcr  
Data Acquired : 9/19/2009 3:00:45 AM  
Data Processed : 4/24/2010 5:28:15 PM

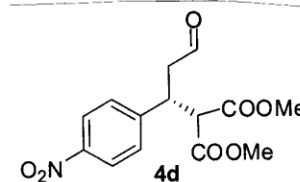

### <Chromatogram>

PeakTable

Detector A Ch1 254nm

| Peak# | Ret. Time | Area     | Height  | Area %  | Height % |
|-------|-----------|----------|---------|---------|----------|
| 1     | 17.981    | 31109016 | 1242069 | 95.418  | 95.024   |
| 2     | 19.462    | 1493921  | 65037   | 4.582   | 4.976    |
| Total |           | 32602937 | 1307106 | 100.000 | 100.000  |

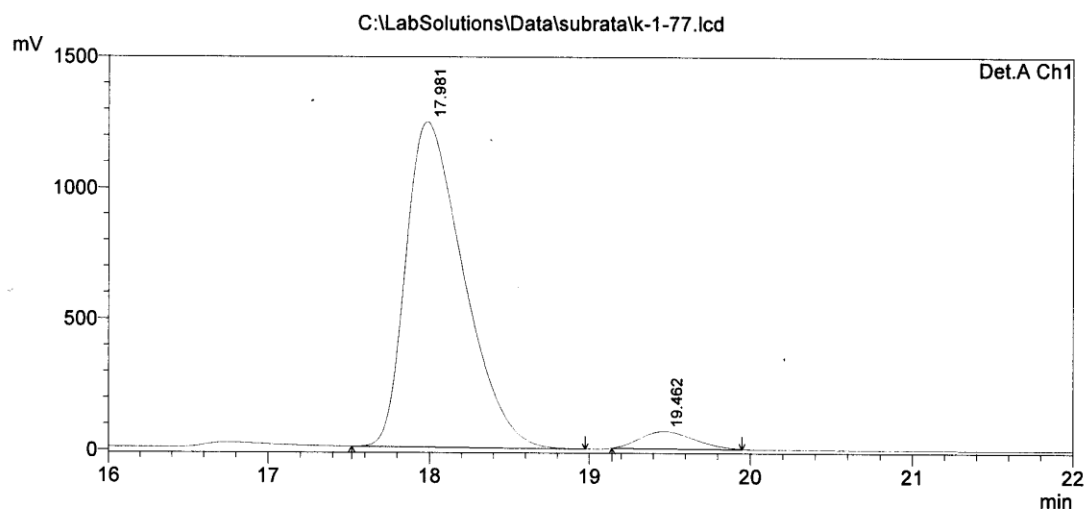

6/28/2012 16:29:51 1 / 2

### ==== Shimadzu LCsolution Analysis Report ====

C:\LabSolutions\Data\subrata\k-2-9.lcd

Acquired by : Admin  
Sample Name : k-2-9  
Sample ID : k-2-9  
Vail # :  
Injection Volume : 5 uL  
Data File Name : k-2-9.lcd  
Method File Name : 70%-Hexane-30%-isopropanol-35min (0.7mL, 254nm).lcm  
Batch File Name :  
Report File Name : Default.lcr  
Data Acquired : 1/11/2010 9:39:01 PM  
Data Processed : 4/5/2010 4:01:35 PM

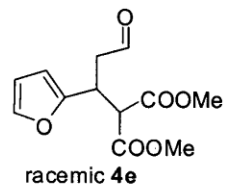

#### <Chromatogram>

Detector A Ch1 254nm

PeakTable

| Peak# | Ret. Time | Area   | Height | Area %  | Height % |
|-------|-----------|--------|--------|---------|----------|
| 1     | 23.685    | 64548  | 1755   | 49.191  | 54.538   |
| 2     | 29.488    | 66672  | 1463   | 50.809  | 45.462   |
| Total |           | 131220 | 3217   | 100.000 | 100.000  |

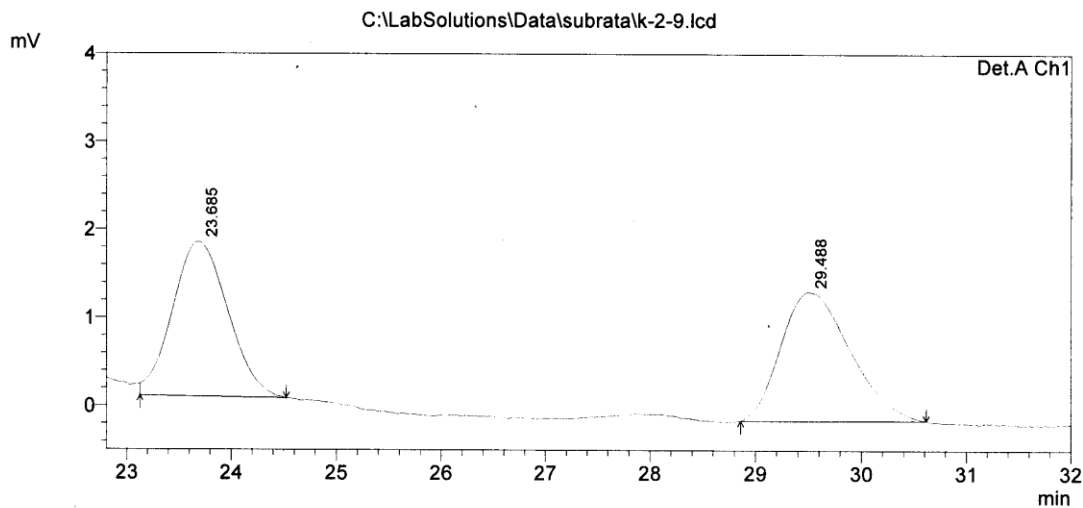



## ==== Shimadzu LCsolution Analysis Report ====

Acquired by : Admin  
Sample Name : sg-214a  
Sample ID : sg-214a  
Vial # :  
Injection Volume : 5 uL  
Data File Name : sg-214a.lcd  
Method File Name : 70%-Hexane-30%-isopropanol-35min (0.7mL, 254nm).lcm  
Batch File Name :  
Report File Name : Default.lcr  
Data Acquired : 1/11/2010 10:15:33 PM  
Data Processed : 4/24/2010 4:33:59 PM

C:\LabSolutions\Data\subrata\sg-214a.lcd

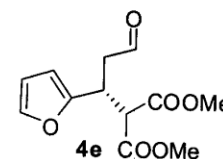

### <Chromatogram>

Detector A Ch1 254nm

PeakTable

| Peak# | Ret. Time | Area   | Height | Area %  | Height % |
|-------|-----------|--------|--------|---------|----------|
| 1     | 23.723    | 55264  | 1840   | 5.573   | 12.822   |
| 2     | 28.493    | 936326 | 12510  | 94.427  | 87.178   |
| Total |           | 991590 | 14350  | 100.000 | 100.000  |

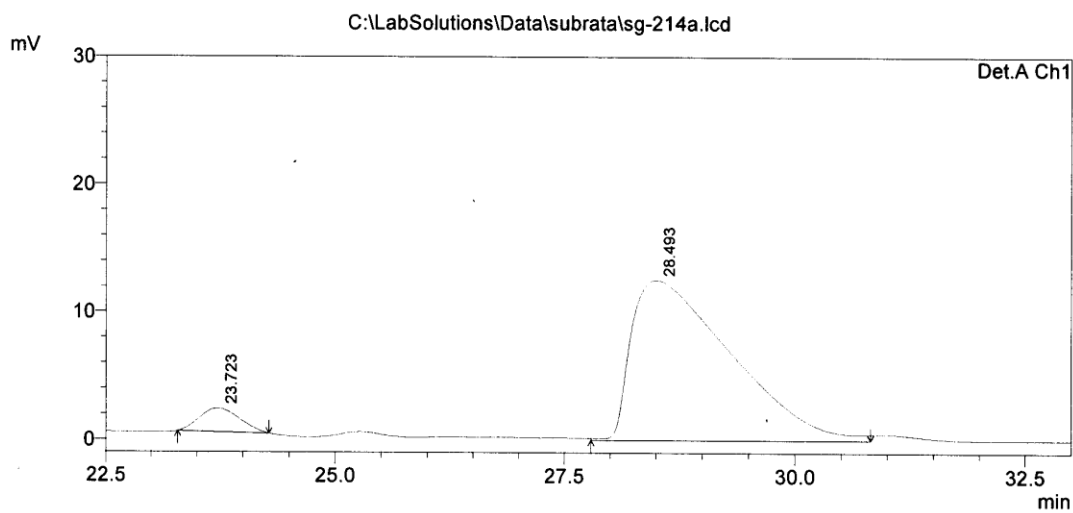

6/28/2012 16:35:26 1 / 1

## ==== Shimadzu LCsolution Analysis Report ====

C:\LabSolutions\Data\subrata\k-2-10E.lcd

Acquired by : Admin  
Sample Name : k-2-10E  
Sample ID : k-2-10E  
Vial # :  
Injection Volume : 5 uL  
Data File Name : k-2-10E.lcd  
Method File Name : 80%-Hexane-20%-isopropanol-30min (1.0 mL, 254nm).lcm  
Batch File Name :  
Report File Name : Default.lcr  
Data Acquired : 1/21/2010 11:22:55 AM  
Data Processed : 4/5/2010 4:03:12 PM

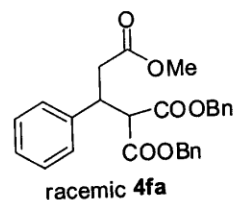

### <Chromatogram>

PeakTable

Detector A Ch1 254nm

| Peak# | Ret. Time | Area   | Height | Area %  | Height % |
|-------|-----------|--------|--------|---------|----------|
| 1     | 7.070     | 340435 | 14821  | 52.281  | 54.648   |
| 2     | 8.011     | 310733 | 12300  | 47.719  | 45.352   |
| Total |           | 651167 | 27122  | 100.000 | 100.000  |

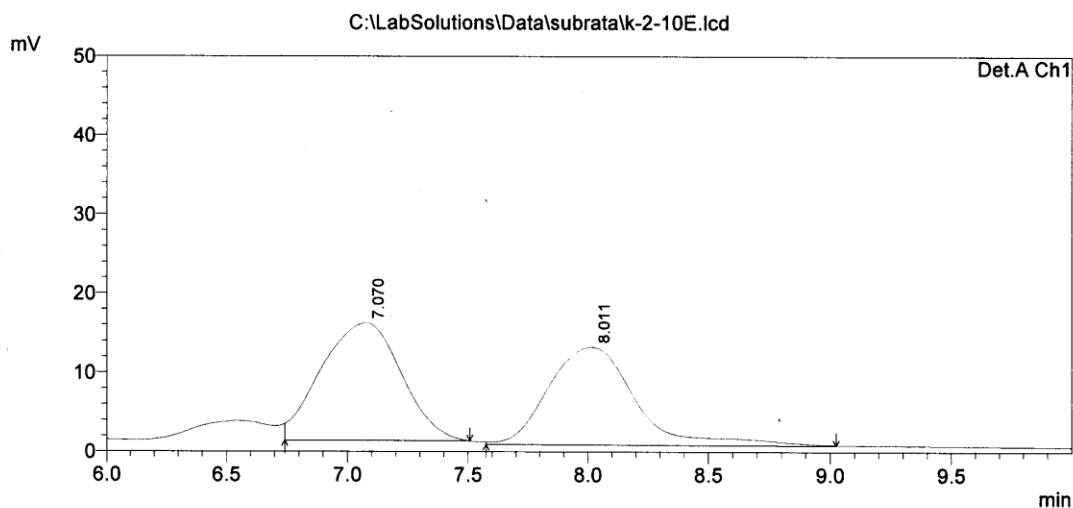

6/28/2012 16:36:14 1 / 1

## ==== Shimadzu LCsolution Analysis Report ====

C:\LabSolutions\Data\subrata\sg-227E.lcd

Acquired by : Admin  
Sample Name : sg-227E  
Sample ID : sg-227E  
Vial # :  
Injection Volume : 5 uL  
Data File Name : sg-227E.lcd  
Method File Name : 80%-Hexane-20%-isopropanol-30min (1.0 mL, 254nm).lcm  
Batch File Name :  
Report File Name : Default.lcr  
Data Acquired : 1/21/2010 1:24:16 PM  
Data Processed : 4/24/2010 4:48:07 PM

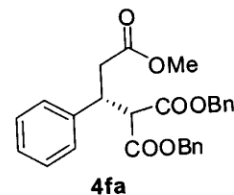

### <Chromatogram>

PeakTable

Detector A Ch1 254nm

| Peak# | Ret. Time | Area   | Height | Area %  | Height % |
|-------|-----------|--------|--------|---------|----------|
| 1     | 7.034     | 784186 | 39828  | 97.308  | 96.918   |
| 2     | 7.991     | 21692  | 1266   | 2.692   | 3.082    |
| Total |           | 805878 | 41095  | 100.000 | 100.000  |

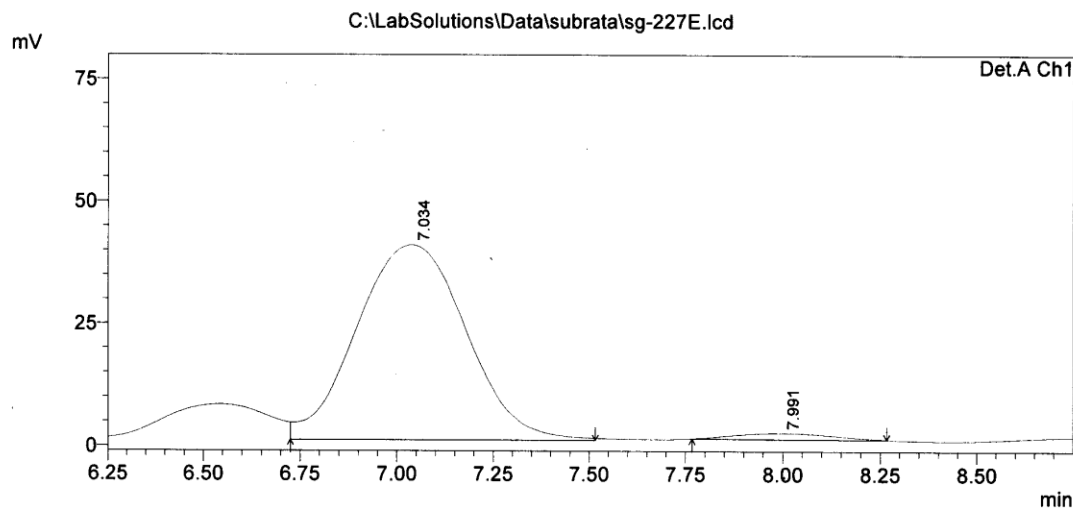

6/28/2012 16:37:25 1 /

## ==== Shimadzu LCsolution Analysis Report ====

Acquired by : Admin  
Sample Name : k-2-14  
Sample ID : k-2-14  
Vail # :  
Injection Volume : 5 uL  
Data File Name : k-2-14.lcd  
Method File Name : 80%-Hexane-20%-isopropanol-60min (0.7 mL, 254nm).lcm  
Batch File Name :  
Report File Name : Default.lcr  
Data Acquired : 1/10/2010 7:59:21 PM  
Data Processed : 6/9/2010 5:46:24 PM

C:\LabSolutions\Data\subrata\k-2-14.lcd

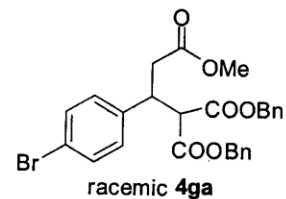

### <Chromatogram>

PeakTable

Detector A Ch1 254nm

| Peak# | Ret. Time | Area    | Height | Area %  | Height % |
|-------|-----------|---------|--------|---------|----------|
| 1     | 36.980    | 1033883 | 17315  | 49.915  | 53.934   |
| 2     | 45.660    | 1037412 | 14789  | 50.085  | 46.066   |
| Total |           | 2071295 | 32104  | 100.000 | 100.000  |

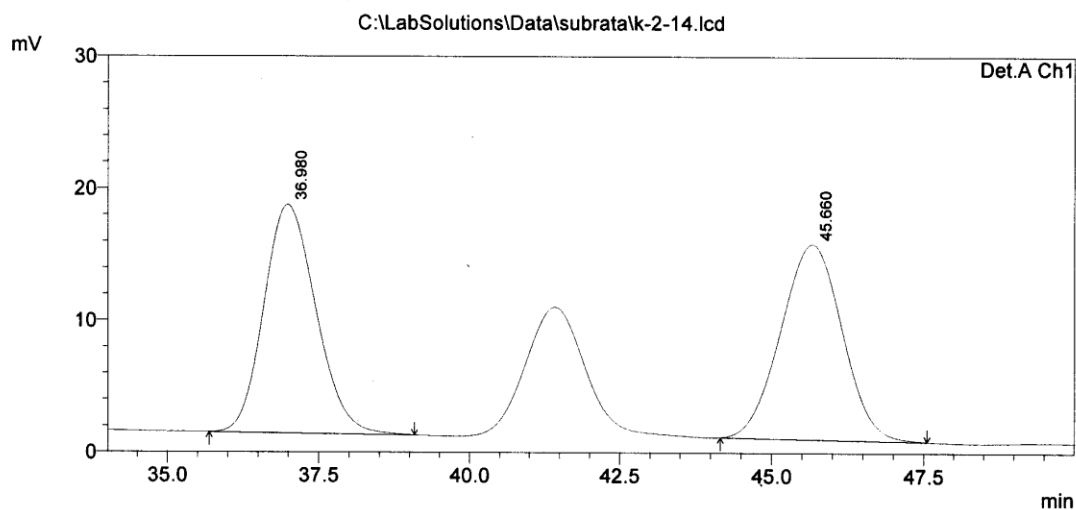

6/28/2012 16:37:59 1 / 1

### ==== Shimadzu LCsolution Analysis Report ====

C:\LabSolutions\Data\subrata\sg-216b.lcd

Acquired by : Admin  
Sample Name : sg-216b  
Sample ID : sg-216b  
Vial # :  
Injection Volume : 5 uL  
Data File Name : sg-216b.lcd  
Method File Name : 80%-Hexane-20%-isopropanol-60min (0.7 mL, 254nm).lcm  
Batch File Name :  
Report File Name : Default.lcr  
Data Acquired : 1/10/2010 9:01:21 PM  
Data Processed : 1/12/2010 8:03:39 PM

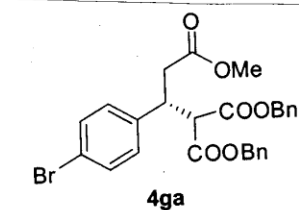

#### <Chromatogram>

Detector A Ch1 254nm

PeakTable

| Peak# | Ret. Time | Area    | Height | Area %  | Height % |
|-------|-----------|---------|--------|---------|----------|
| 1     | 37.251    | 63050   | 1212   | 4.584   | 6.087    |
| 2     | 45.427    | 1312518 | 18700  | 95.416  | 93.913   |
| Total |           | 1375568 | 19912  | 100.000 | 100.000  |

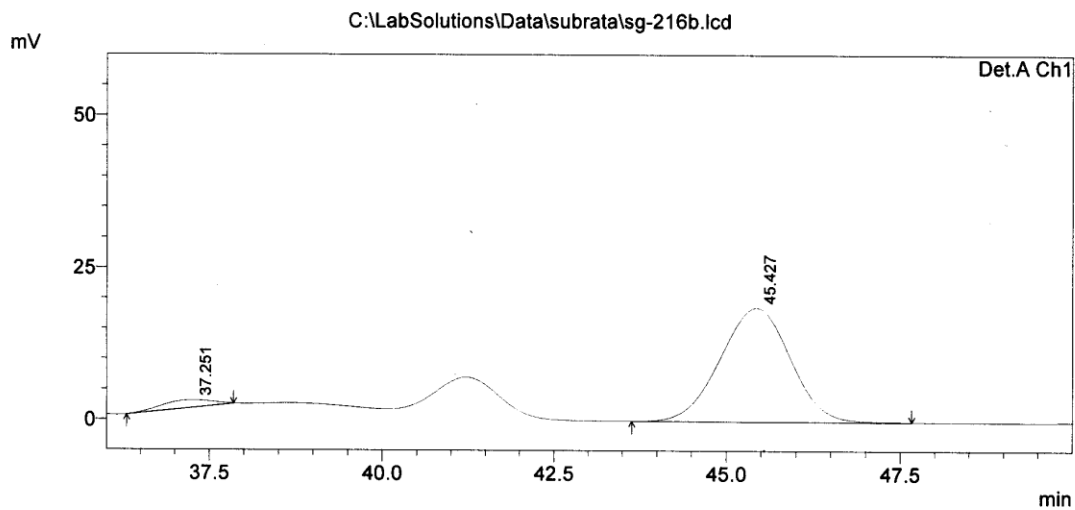

## ==== Shimadzu LCsolution Analysis Report ====

Acquired by : Admin  
Sample Name : k-2-22  
Sample ID : k-2-22  
Vial # :  
Injection Volume : 5 uL  
Data File Name : k-2-22.lcd  
Method File Name : 70%-Hexane-30%-isopropanol-120min (1.0mL, 220nm).lcm  
Batch File Name :  
Report File Name : Default.lcr  
Data Acquired : 2/10/2010 4:29:36 PM  
Data Processed : 4/5/2010 4:17:39 PM

C:\LabSolutions\Data\subrata\k-2-22.lcd

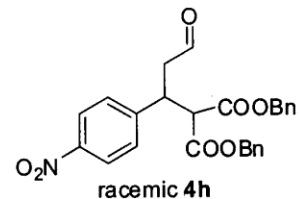

### <Chromatogram>

PeakTable

Detector A Ch1 220nm

| Peak# | Ret. Time | Area     | Height | Area %  | Height % |
|-------|-----------|----------|--------|---------|----------|
| 1     | 86.004    | 19214343 | 77300  | 50.374  | 57.740   |
| 2     | 113.741   | 18928807 | 56576  | 49.626  | 42.260   |
| Total |           | 38143150 | 133876 | 100.000 | 100.000  |

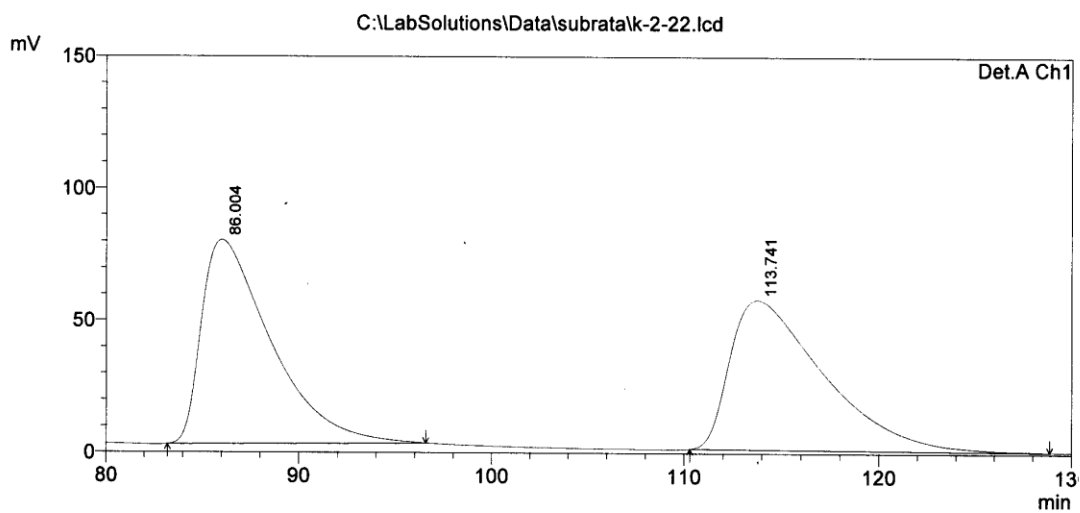

## ==== Shimadzu LCsolution Analysis Report ====

C:\LabSolutions\Data\subrata\sg-240-1.lcd

Acquired by : Admin  
Sample Name : sg-240-1  
Sample ID : sg-240-1  
Vial # :  
Injection Volume : 5 uL  
Data File Name : sg-240-1.lcd  
Method File Name : 70%-Hexane-30%-isopropanol-120min (1.0mL, 220nm).lcm  
Batch File Name :  
Report File Name : Default.lcr  
Data Acquired : 2/3/2010 9:25:12 PM  
Data Processed : 2/4/2010 8:26:08 PM

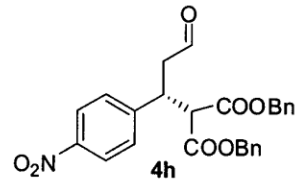

### <Chromatogram>

PeakTable

Detector A Ch1 220nm

| Peak# | Ret. Time | Area     | Height | Area %  | Height % |
|-------|-----------|----------|--------|---------|----------|
| 1     | 89.034    | 449563   | 2507   | 3.444   | 5.665    |
| 2     | 114.753   | 12604779 | 41747  | 96.556  | 94.335   |
| Total |           | 13054342 | 44253  | 100.000 | 100.000  |

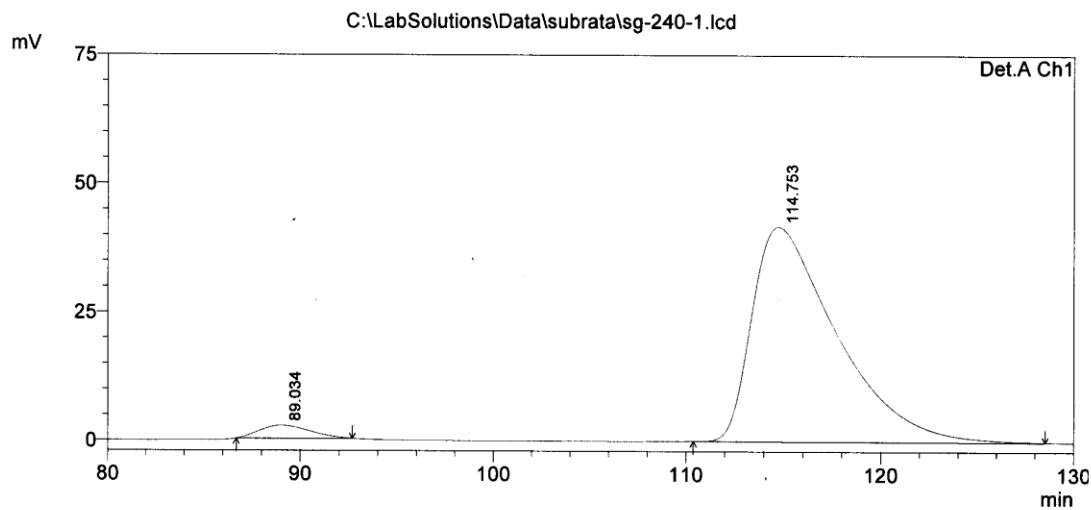

8/25/2012 16:51:31 1 / 2

==== Shimadzu LCsolution Analysis Report ====

Acquired by : Admin  
Sample Name : sg-235a  
Sample ID : sg-235a  
Vial # :  
Injection Volume : 5 uL  
Data File Name : sg-235a.lcd  
Method File Name : 70%-Hexane-30%-isopropanol-70min (1.0mL, 220nm).lcm  
Batch File Name :  
Report File Name : Default.lcr  
Data Acquired : 2/1/2010 10:42:22 PM  
Data Processed : 4/24/2010 4:53:08 PM

C:\LabSolutions\Data\subrata\sg-235a.lcd

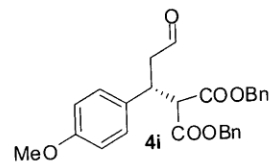

<Chromatogram>

PeakTable

| Peak# | Ret. Time | Area     | Height | Area %  | Height % |
|-------|-----------|----------|--------|---------|----------|
| 1     | 68.646    | 1218553  | 8307   | 2.737   | 4.275    |
| 2     | 75.668    | 43306329 | 186002 | 97.263  | 95.725   |
| Total |           | 44524882 | 194309 | 100.000 | 100.000  |

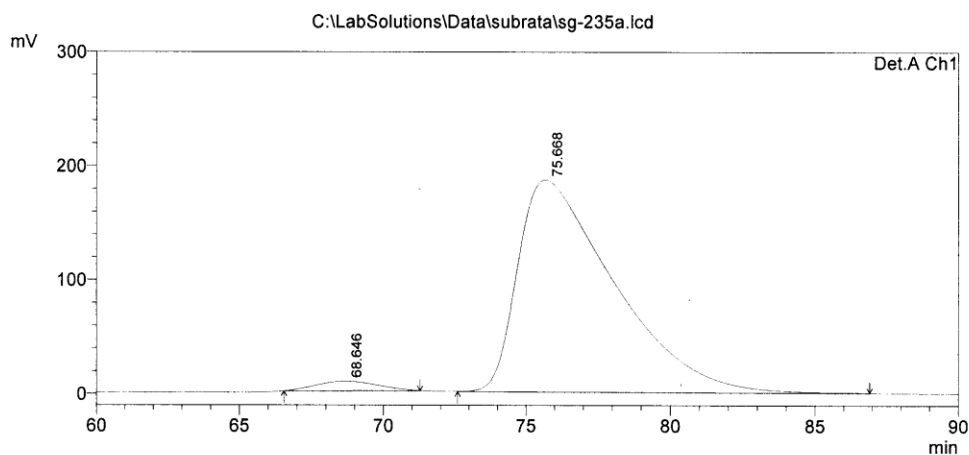



6/28/2012 16:40:13 1 /

### ==== Shimadzu LCsolution Analysis Report ====

C:\LabSolutions\Data\subrata\k-2-20a.lcd  
Acquired by : Admin  
Sample Name : k-2-20a  
Sample ID : k-2-20a  
Vail # :  
Injection Volume : 5 uL  
Data File Name : k-2-20a.lcd  
Method File Name : 70%-Hexane-30%-isopropanol-45min (0.5mL, 220nm).lcm  
Batch File Name :  
Report File Name : Default.lcr  
Data Acquired : 2/9/2010 2:57:46 PM  
Data Processed : 4/5/2010 4:14:09 PM

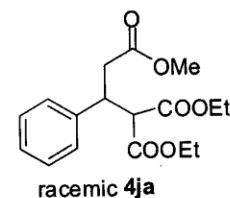

#### <Chromatogram>

Detector A Ch1 220nm

PeakTable

| Peak# | Ret. Time | Area     | Height | Area %  | Height % |
|-------|-----------|----------|--------|---------|----------|
| 1     | 25.843    | 7332105  | 126815 | 49.805  | 52.917   |
| 2     | 27.715    | 7389465  | 112836 | 50.195  | 47.083   |
| Total |           | 14721570 | 239651 | 100.000 | 100.000  |

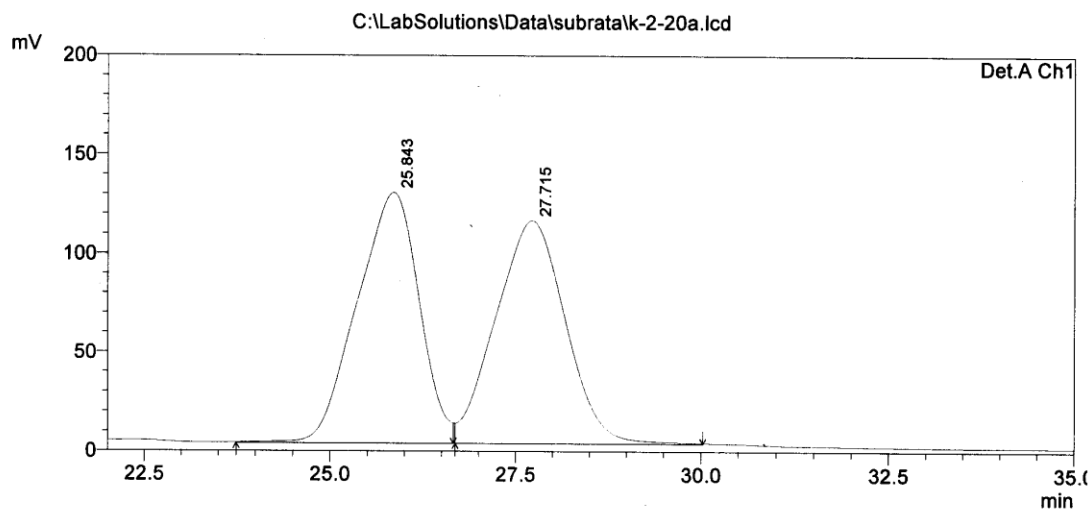

6/28/2012 16:41:05 1 / 1

### ==== Shimadzu LCsolution Analysis Report ====

C:\LabSolutions\Data\subrata\sg-234a.lcd  
Acquired by : Admin  
Sample Name : sg-234a  
Sample ID : sg-234a  
Vial # :  
Injection Volume : 5 uL  
Data File Name : sg-234a.lcd  
Method File Name : 70%-Hexane-30%-isopropanol-45min (0.5mL, 220nm).lcm  
Batch File Name :  
Report File Name : Default.lcr  
Data Acquired : 2/2/2010 11:11:54 AM  
Data Processed : 2/9/2010 2:56:05 PM

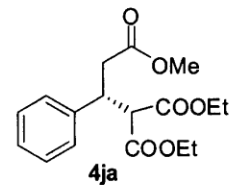

#### <Chromatogram>

PeakTable

Detector A Ch1 220nm

| Peak# | Ret. Time | Area     | Height | Area %  | Height % |
|-------|-----------|----------|--------|---------|----------|
| 1     | 26.122    | 191730   | 4768   | 1.518   | 2.529    |
| 2     | 27.836    | 12441608 | 183763 | 98.482  | 97.471   |
| Total |           | 12633338 | 188531 | 100.000 | 100.000  |

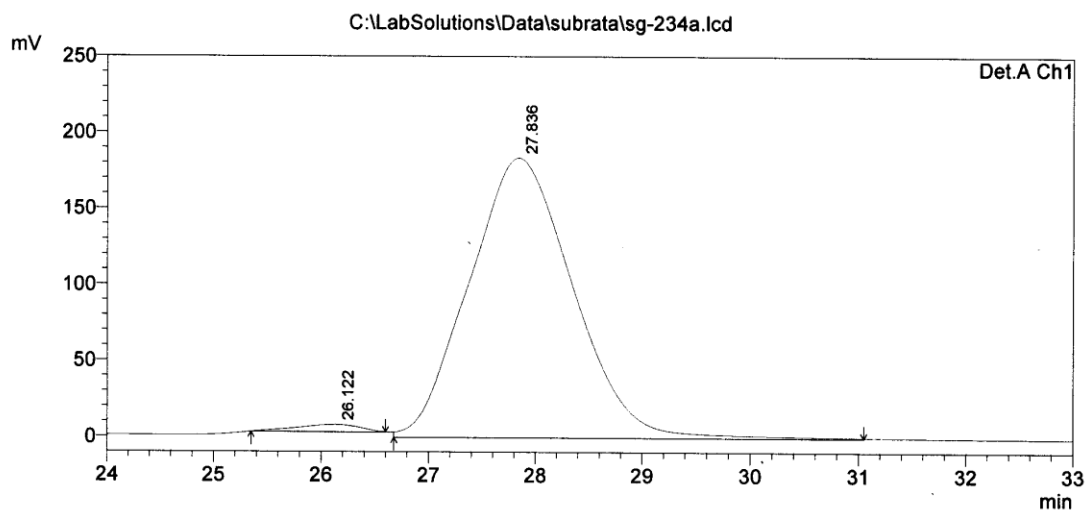

6/28/2012 16:39:25 1 / 2

### ==== Shimadzu LCsolution Analysis Report ====

Acquired by : Admin  
Sample Name : k-2-15a  
Sample ID : k-2-15a  
Vail # :  
Injection Volume : 5 uL  
Data File Name : k-2-15a.lcd  
Method File Name : 95%-Hexane-5%-isopropanol-50min (0.7mL, 254nm).lcm  
Batch File Name :  
Report File Name : Default.lcr  
Data Acquired : 2/4/2010 8:45:42 PM  
Data Processed : 4/5/2010 4:10:06 PM

C:\LabSolutions\Data\subrata\k-2-15a.lcd

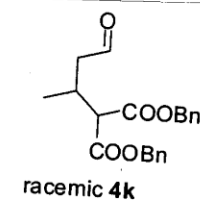

#### <Chromatogram>

PeakTable

Detector A Ch1 254nm

| Peak# | Ret. Time | Area   | Height | Area %  | Height % |
|-------|-----------|--------|--------|---------|----------|
| 1     | 23.467    | 110264 | 2539   | 44.774  | 43.836   |
| 2     | 24.465    | 136005 | 3253   | 55.226  | 56.164   |
| Total |           | 246268 | 5791   | 100.000 | 100.000  |

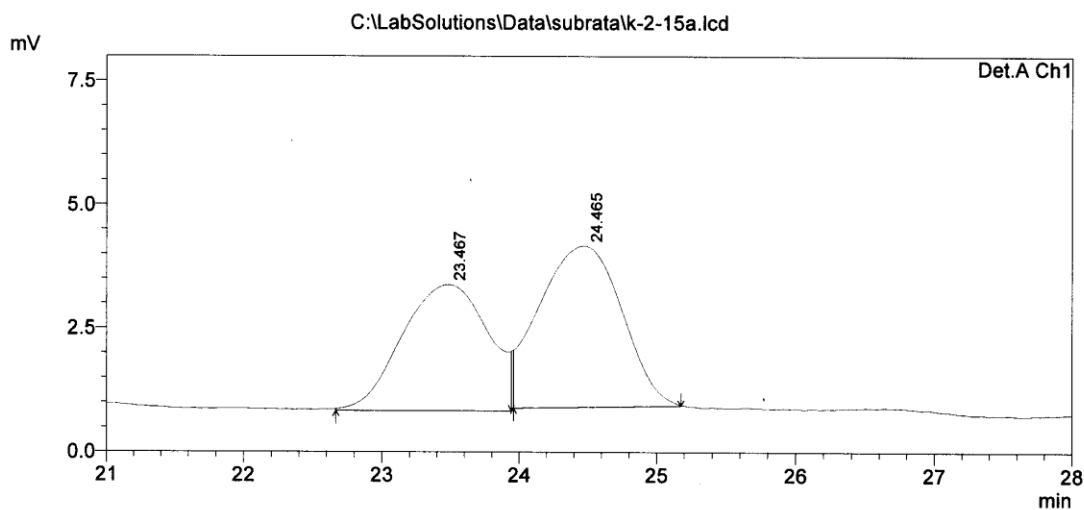

## ==== Shimadzu LCsolution Analysis Report ====

C:\LabSolutions\Data\subrata\sg-239.lcd

Acquired by : Admin  
Sample Name : sg-239  
Sample ID : sg-239  
Vial # :  
Injection Volume : 5 uL  
Data File Name : sg-239.lcd  
Method File Name : 95%-Hexane-5%-isopropanol-50min (0.7mL, 254nm).lcm  
Batch File Name :  
Report File Name : Default.lcr  
Data Acquired : 2/4/2010 7:00:03 PM  
Data Processed : 4/24/2010 5:30:12 PM

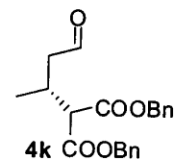

### <Chromatogram>

PeakTable

Detector A Ch1 254nm

| Peak# | Ret. Time | Area    | Height | Area %  | Height % |
|-------|-----------|---------|--------|---------|----------|
| 1     | 23.703    | 326960  | 10200  | 7.354   | 8.898    |
| 2     | 24.733    | 4119148 | 104431 | 92.646  | 91.102   |
| Total |           | 4446108 | 114630 | 100.000 | 100.000  |

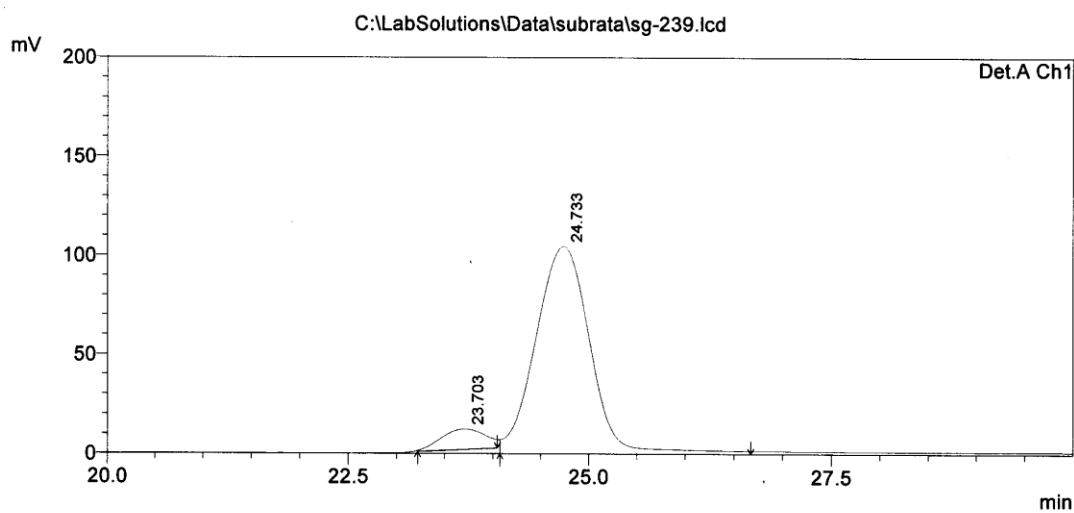

Supplement: c2ob26248g.pdf [file c2ob26248g.pdf]
